# Supplementary material for: Interannual variability in the Australian carbon cycle over 2015–2019, based on assimilation of OCO-2 satellite data
Source: Copernicus journal article supplement (doi:10.5194/acp-2022-15), 2022-02-11
Supplement: Supplementary file 1 [file acp-2022-15-supplement.pdf]

# Supplementary material

## 1 Wind direction analysis

### 1.1 Wind directions at TCCON sites

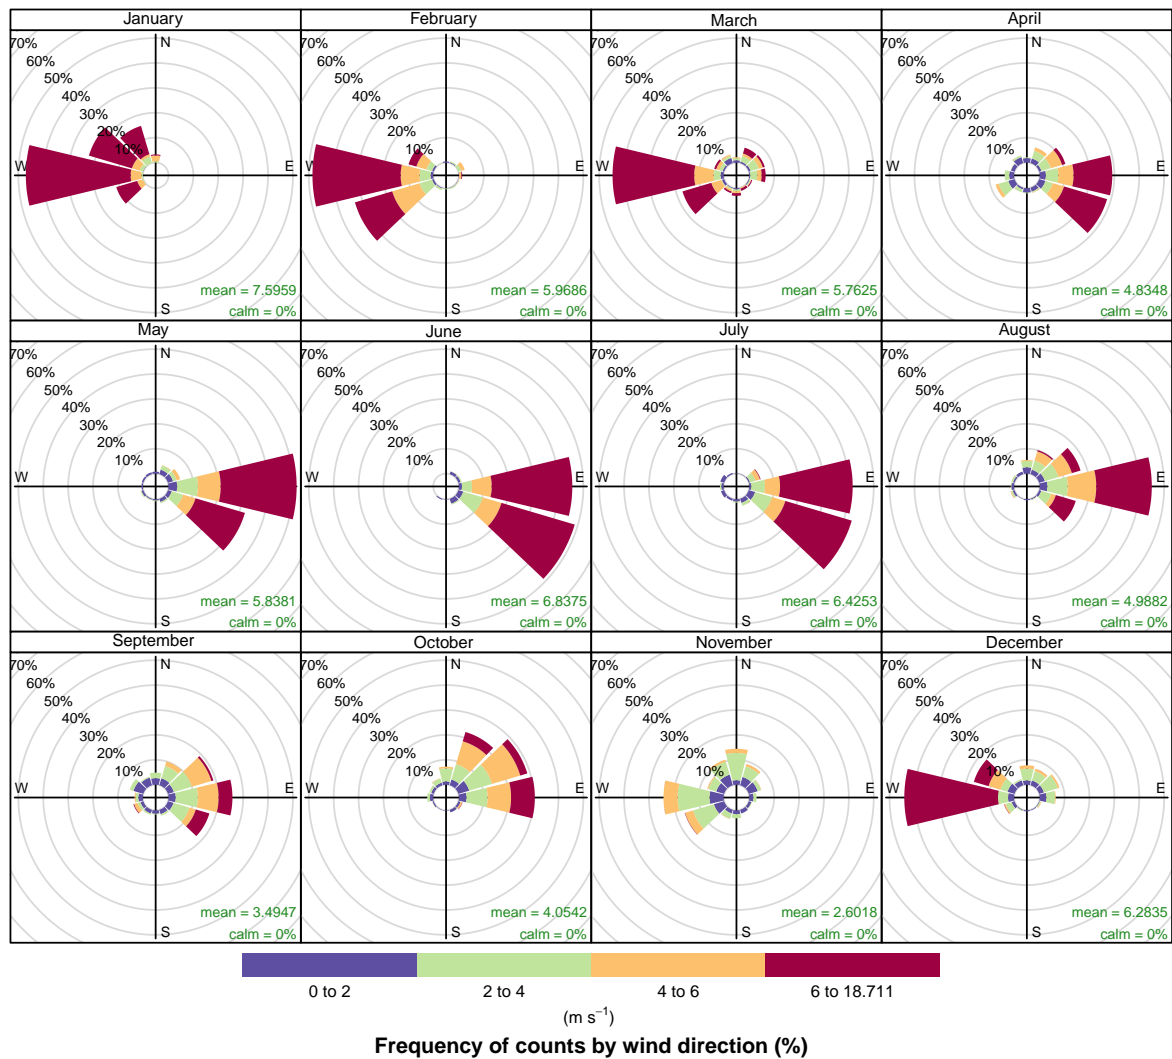

Figure S1. Wind rose TCCON Darwin location for 2015.

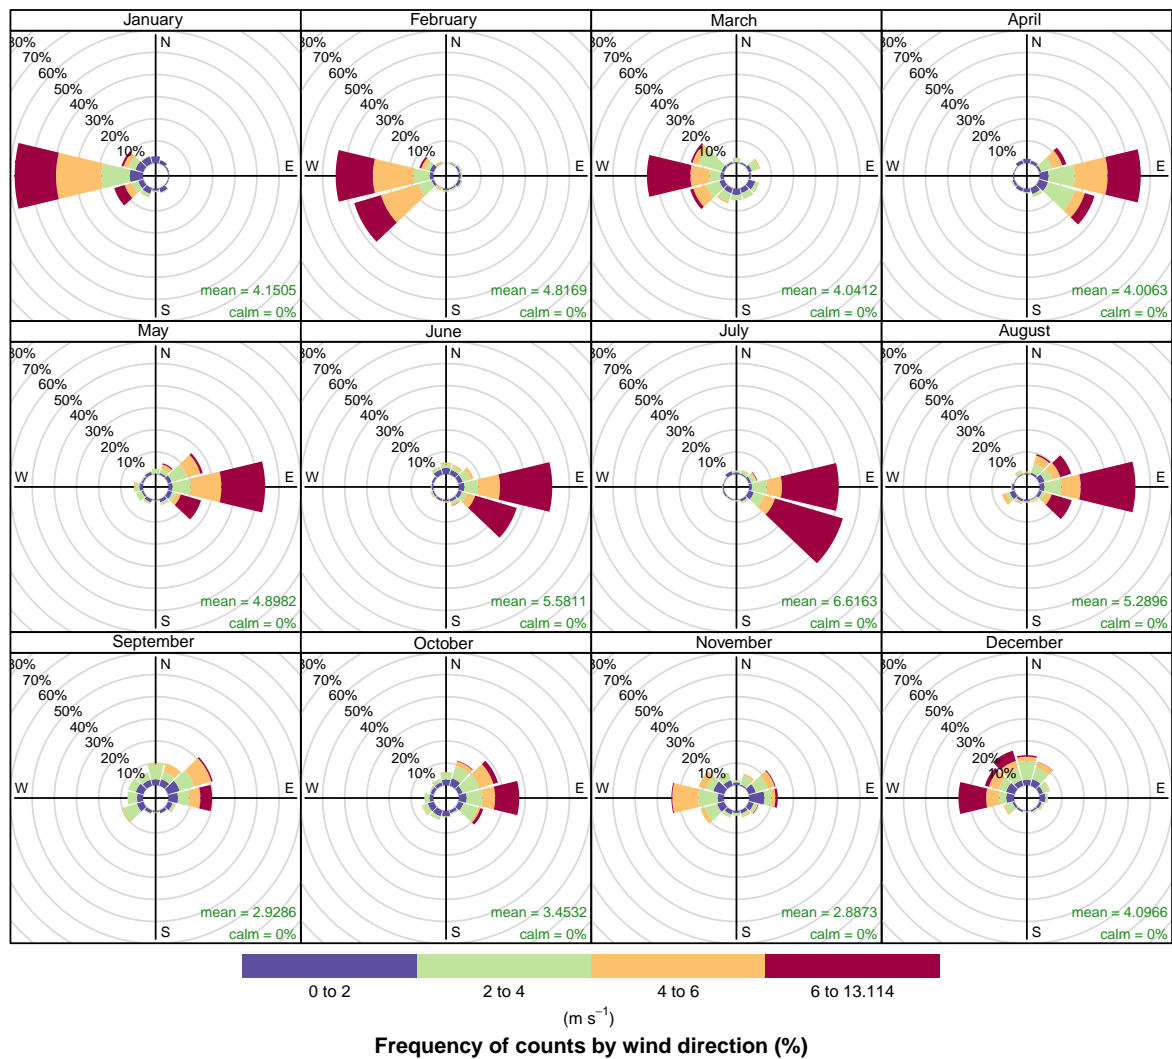

**Figure S2.** Wind rose TCCON Darwin location for 2016.



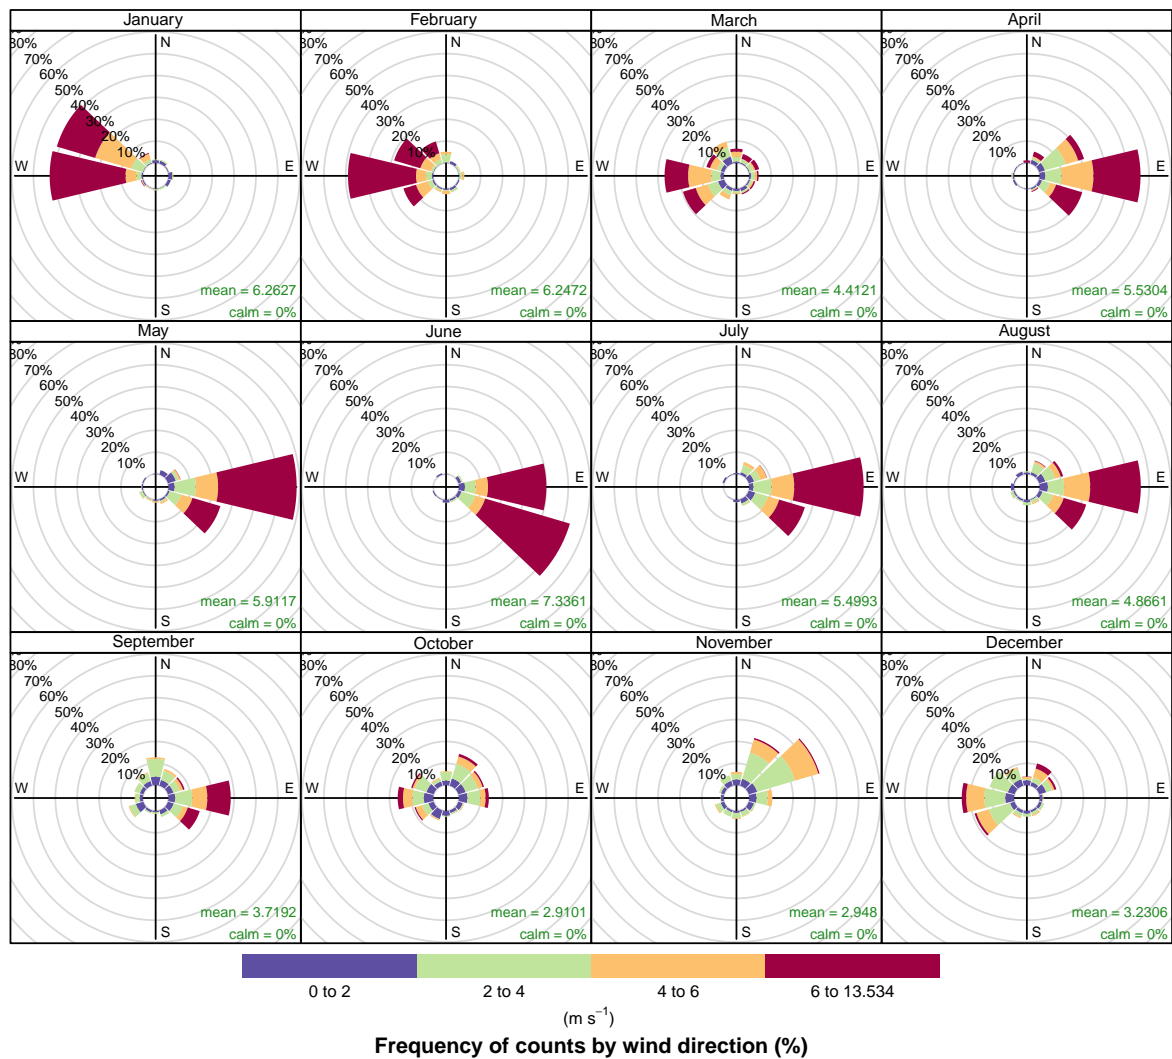

**Figure S3.** Wind rose TCCON Darwin Location for 2017.

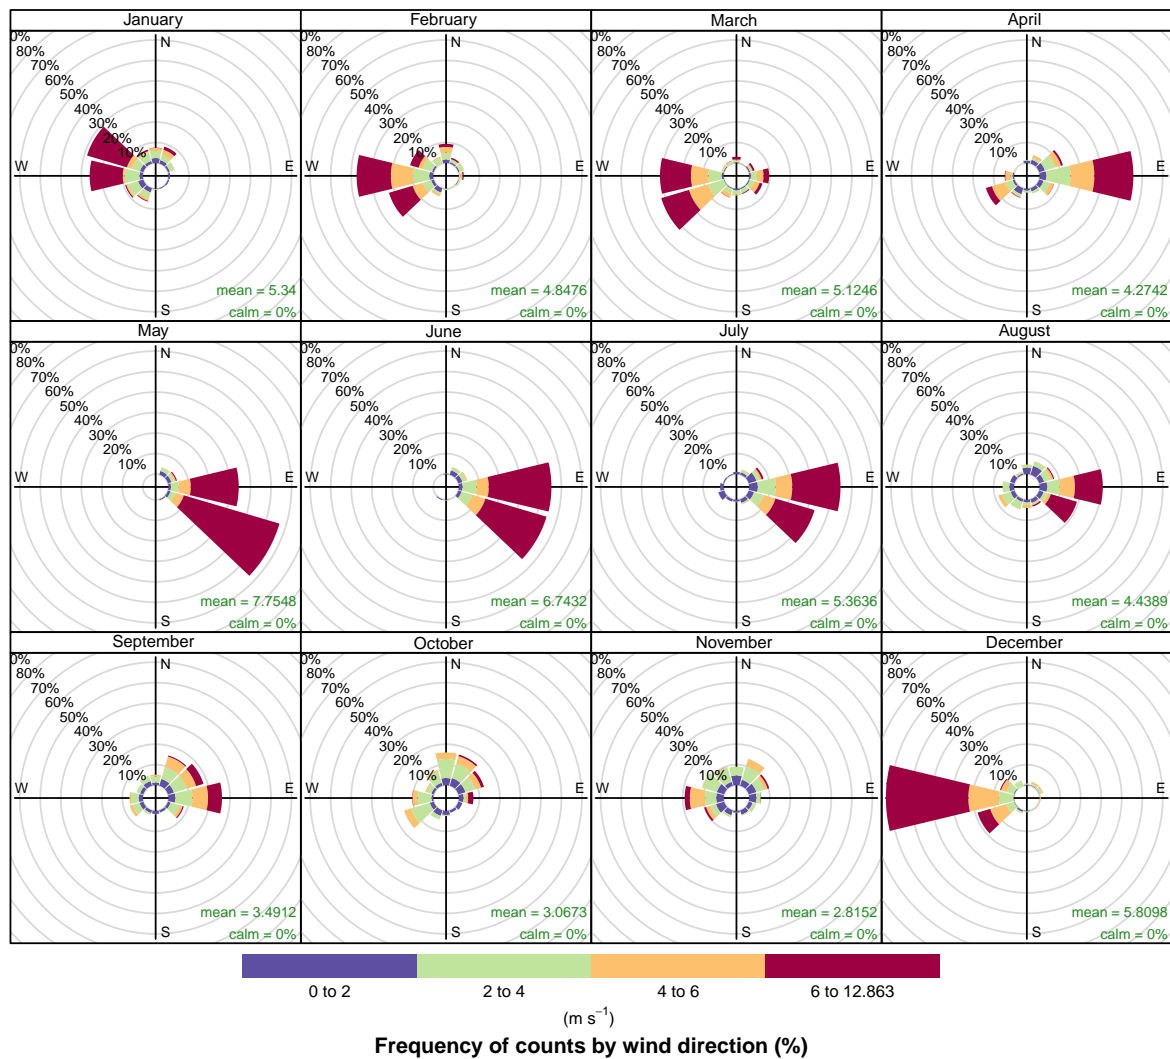

**Figure S4.** Wind rose TCCON Darwin Location for 2018.

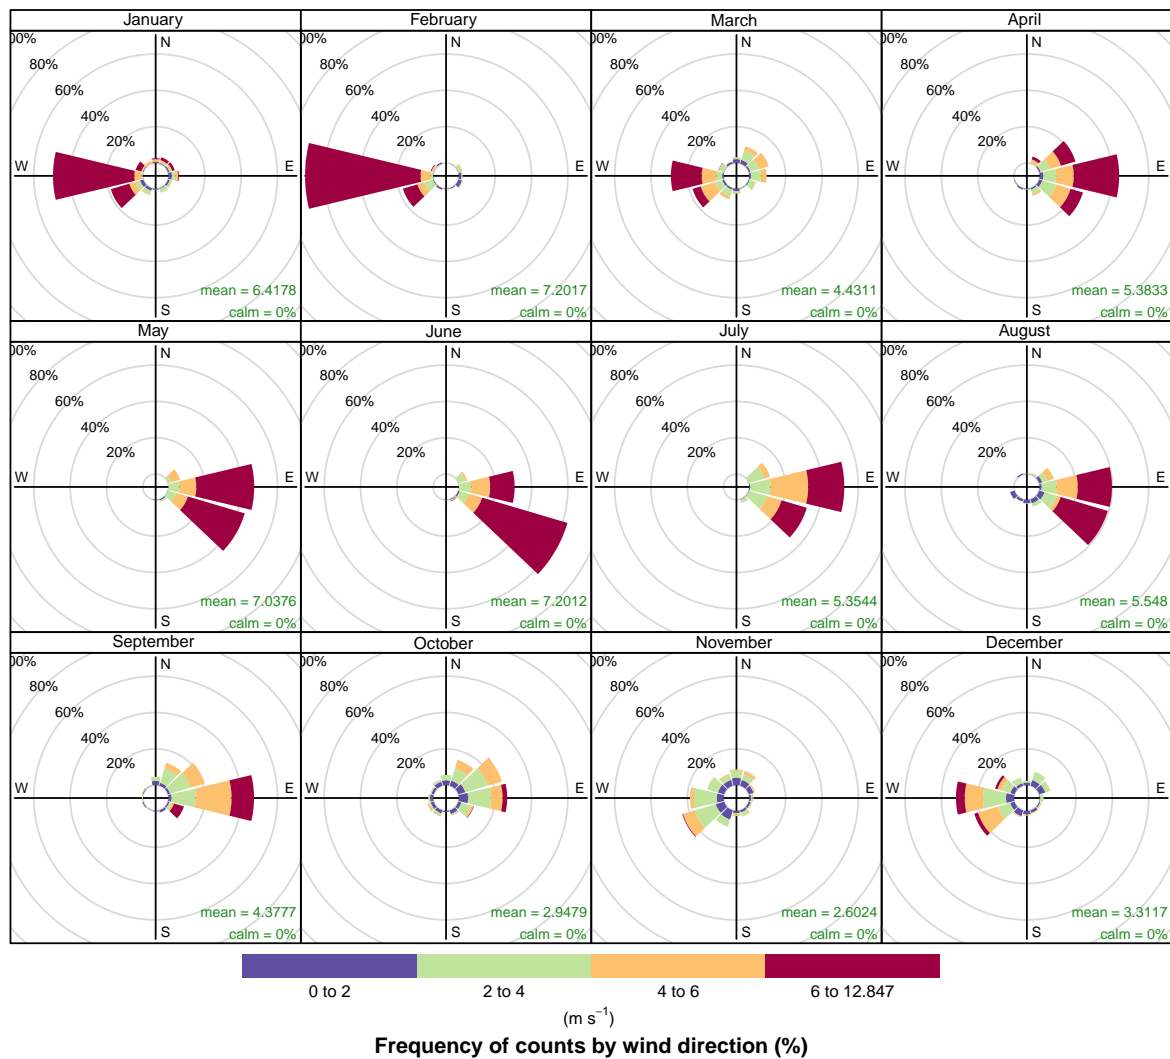

**Figure S5.** Wind rose TCCON Darwin Location for 2019.

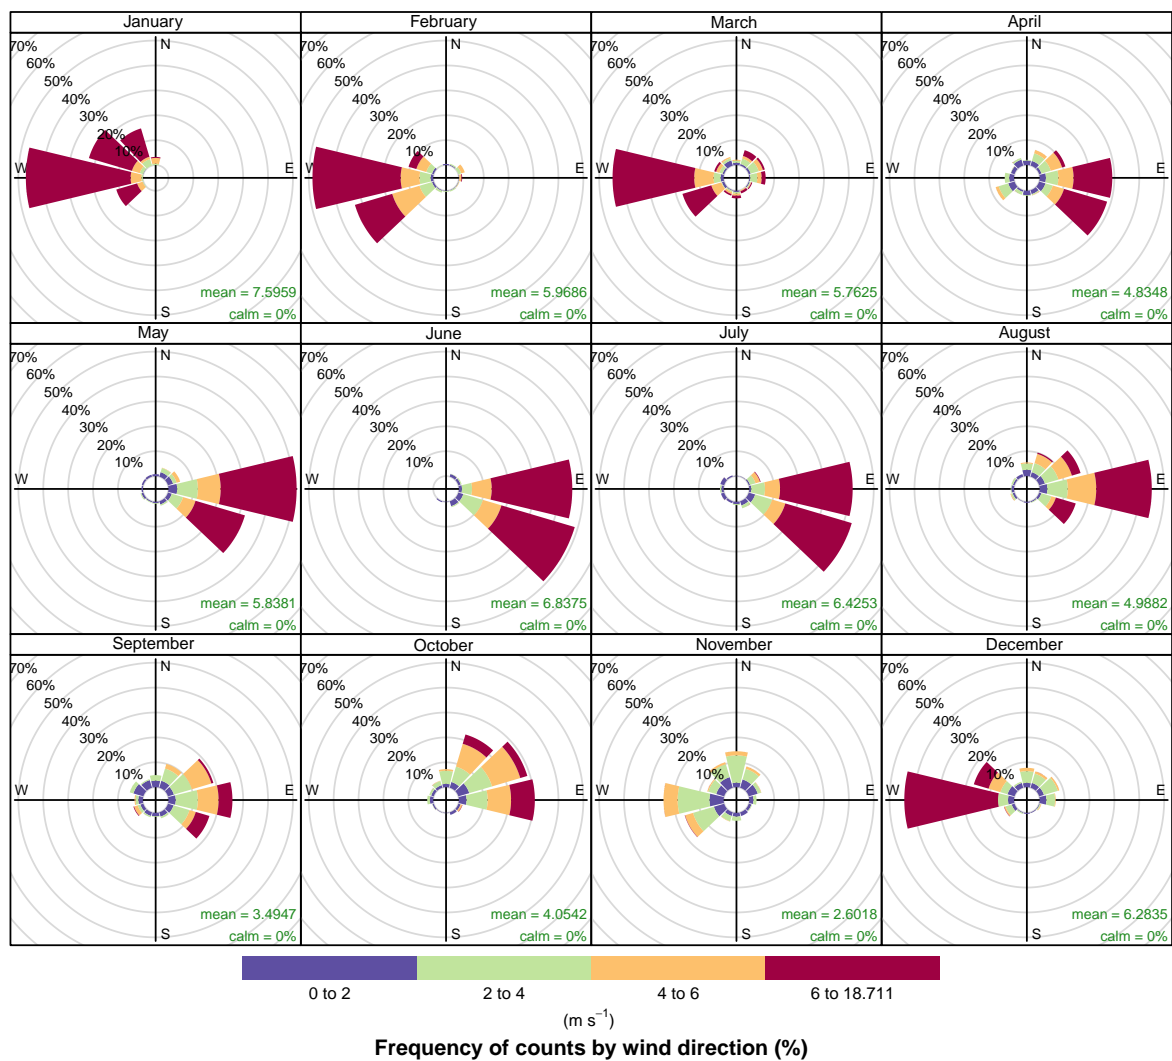

**Figure S6.** Wind rose TCCON Lauder location for 2015.

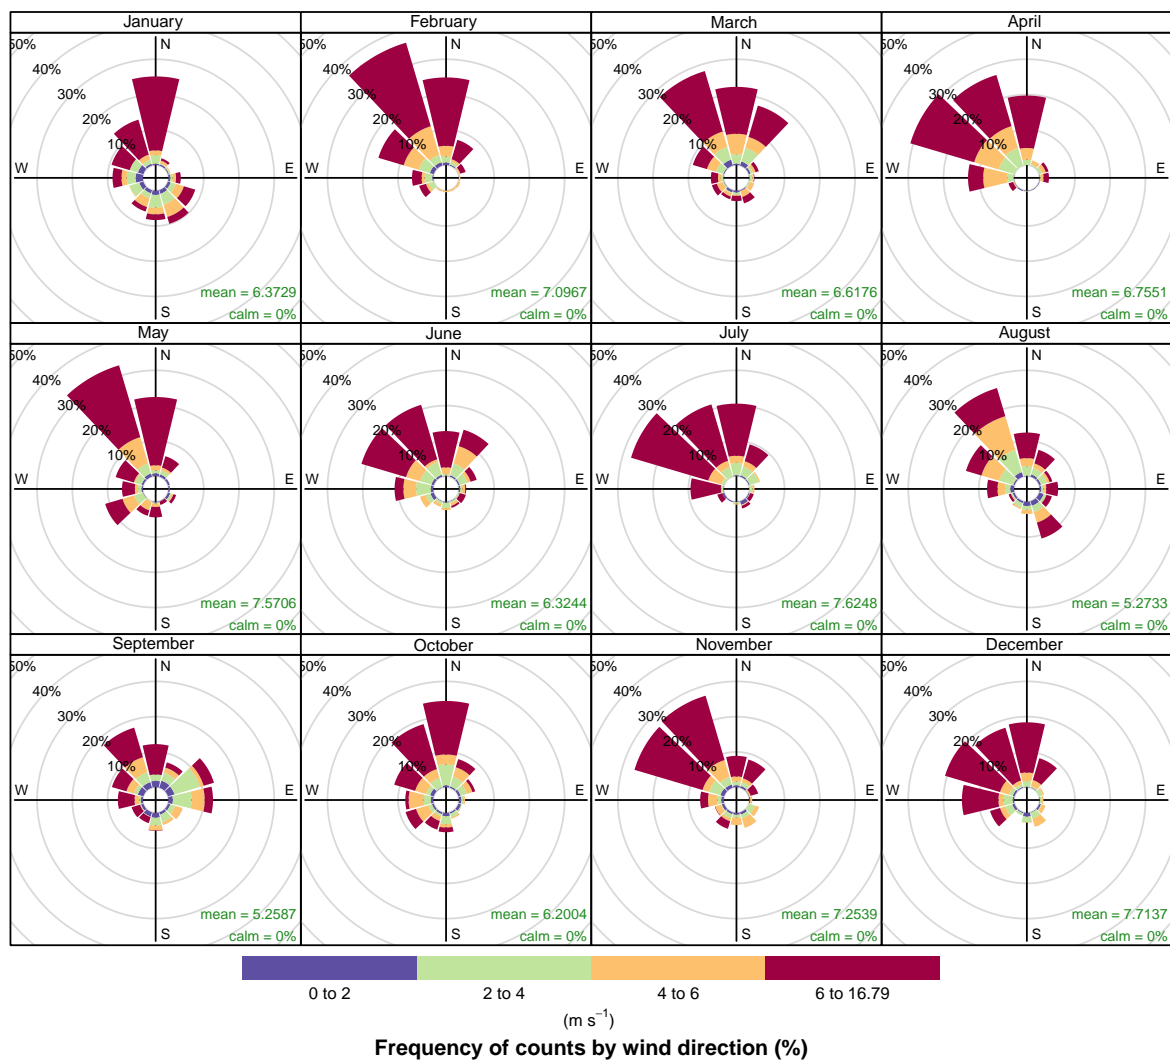

**Figure S7.** Wind rose TCCON Lauder location for 2016.

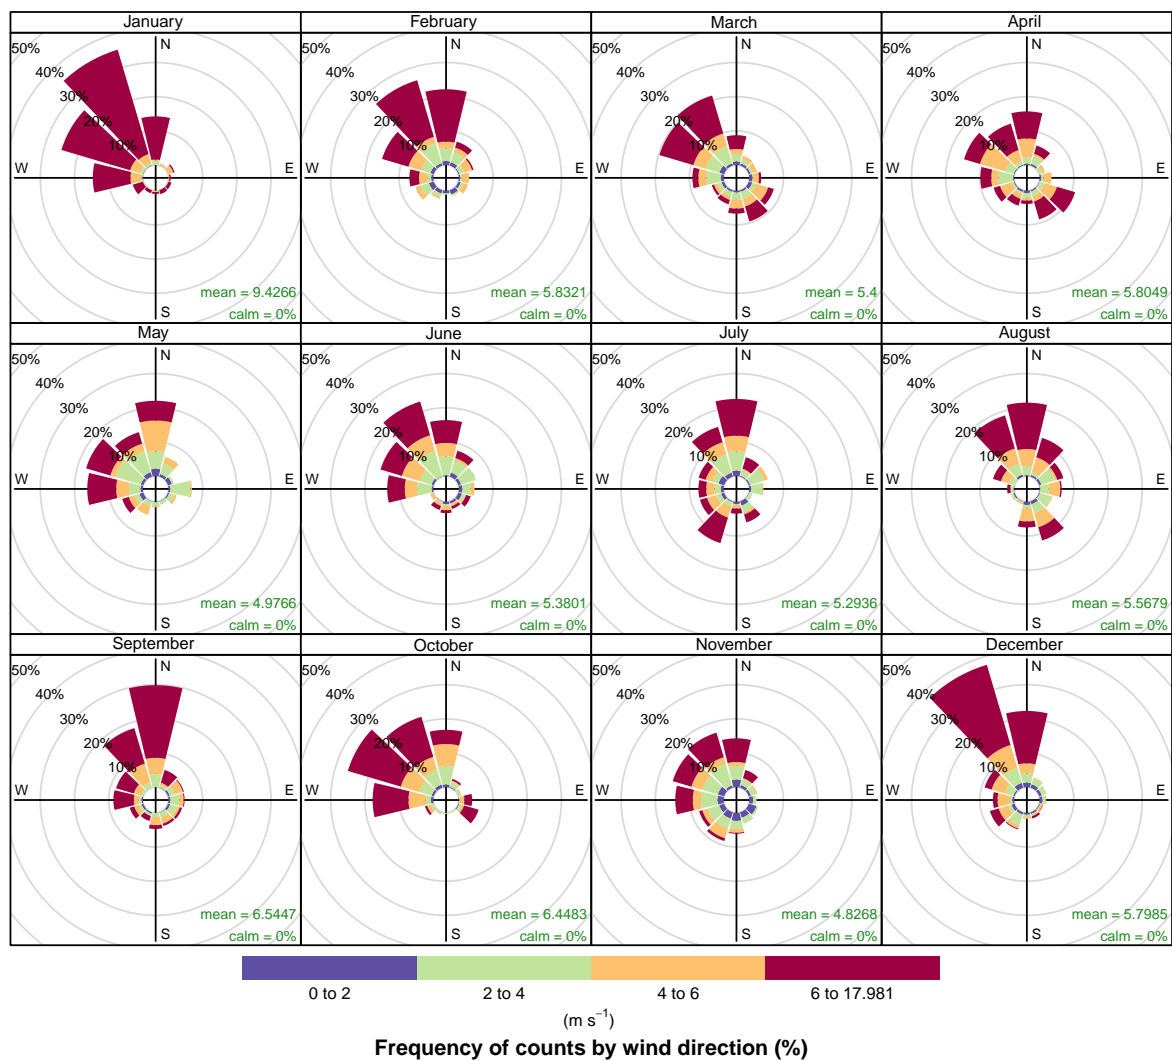

**Figure S8.** Wind rose TCCON Lauder Location for 2017.

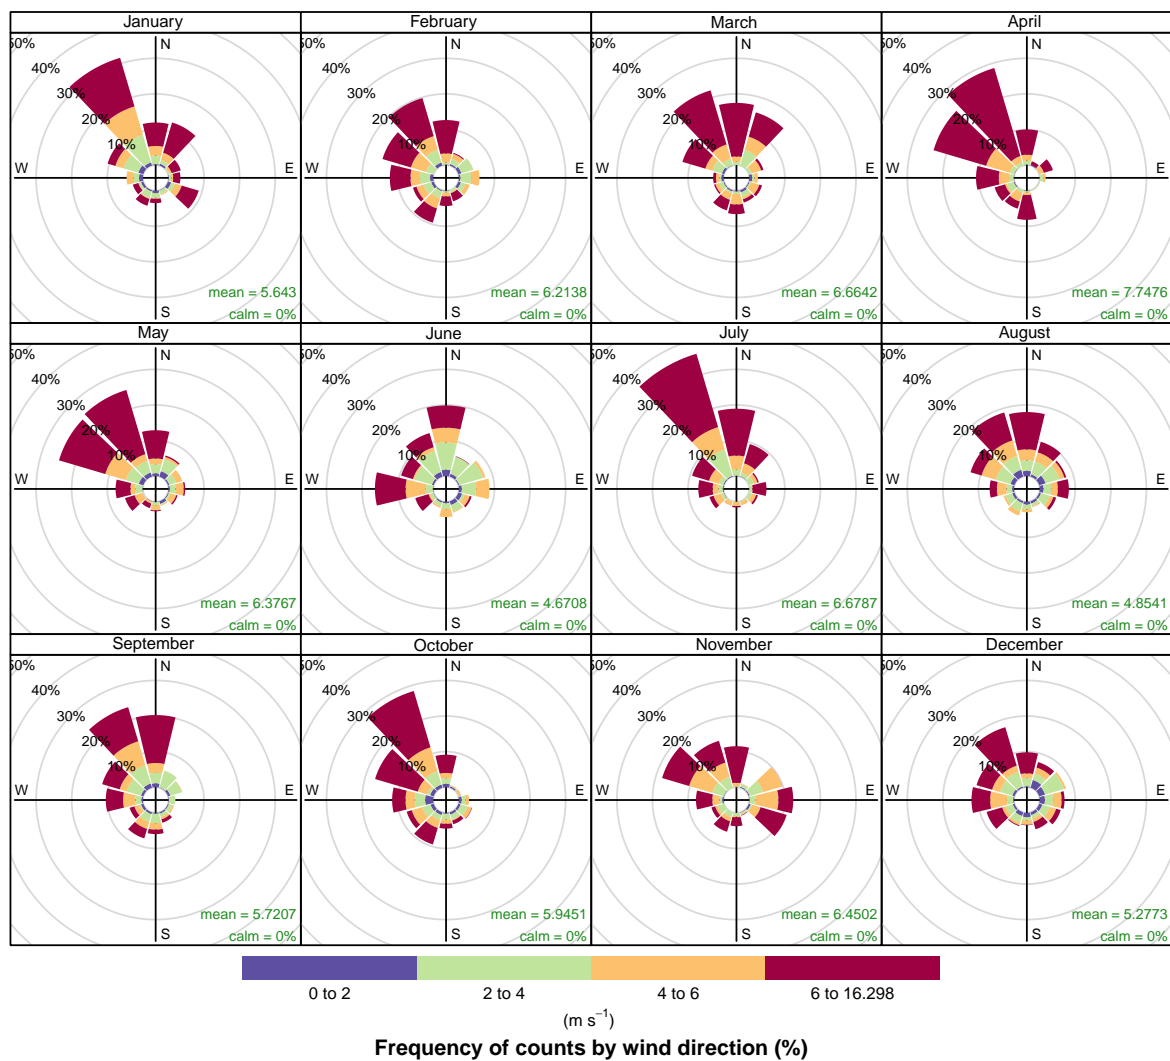

**Figure S9.** Wind rose TCCON Lauder Location for 2018.



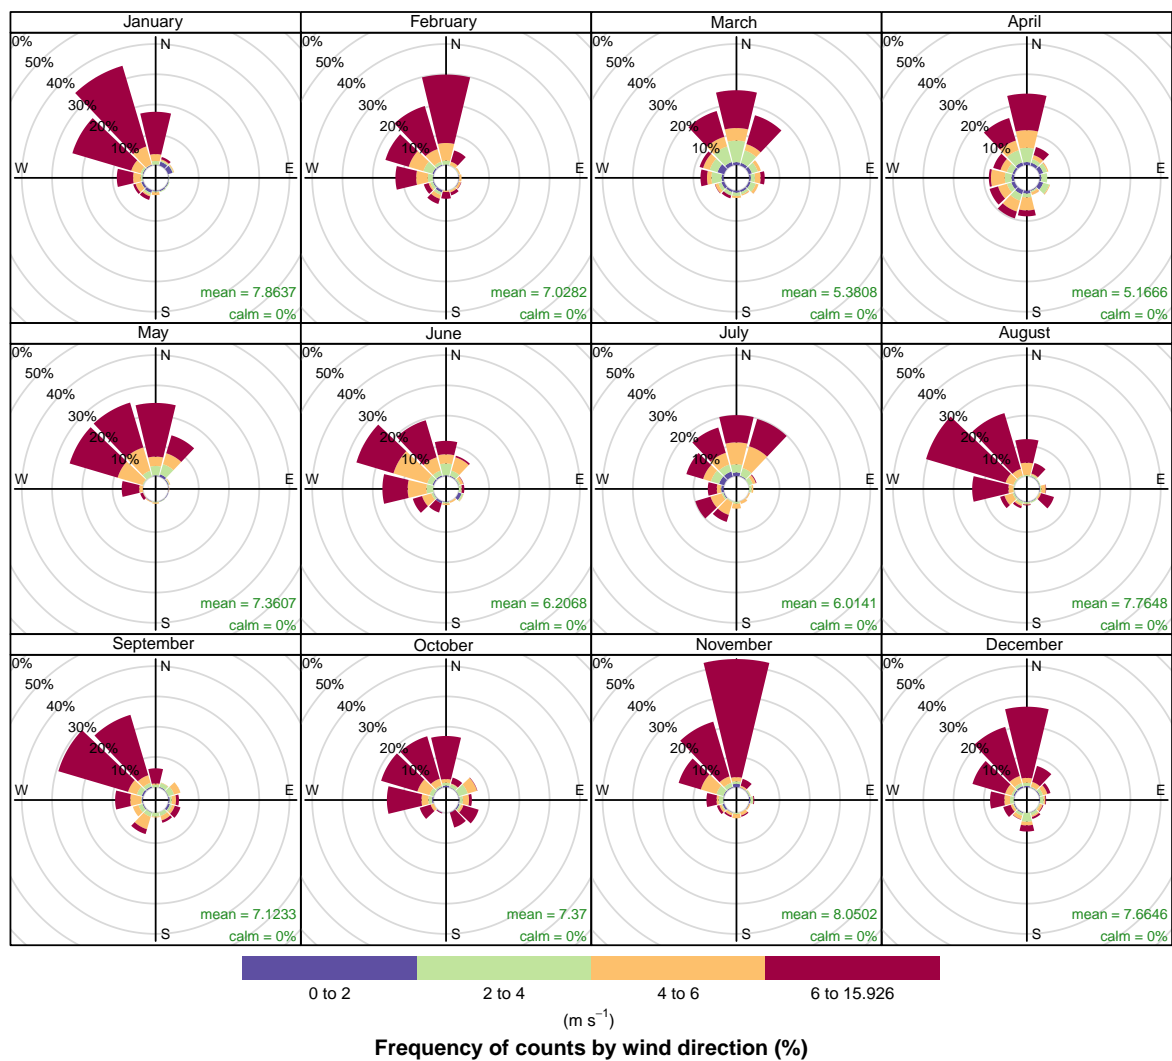

**Figure S10.** Wind rose TCCON Lauder Location for 2019.

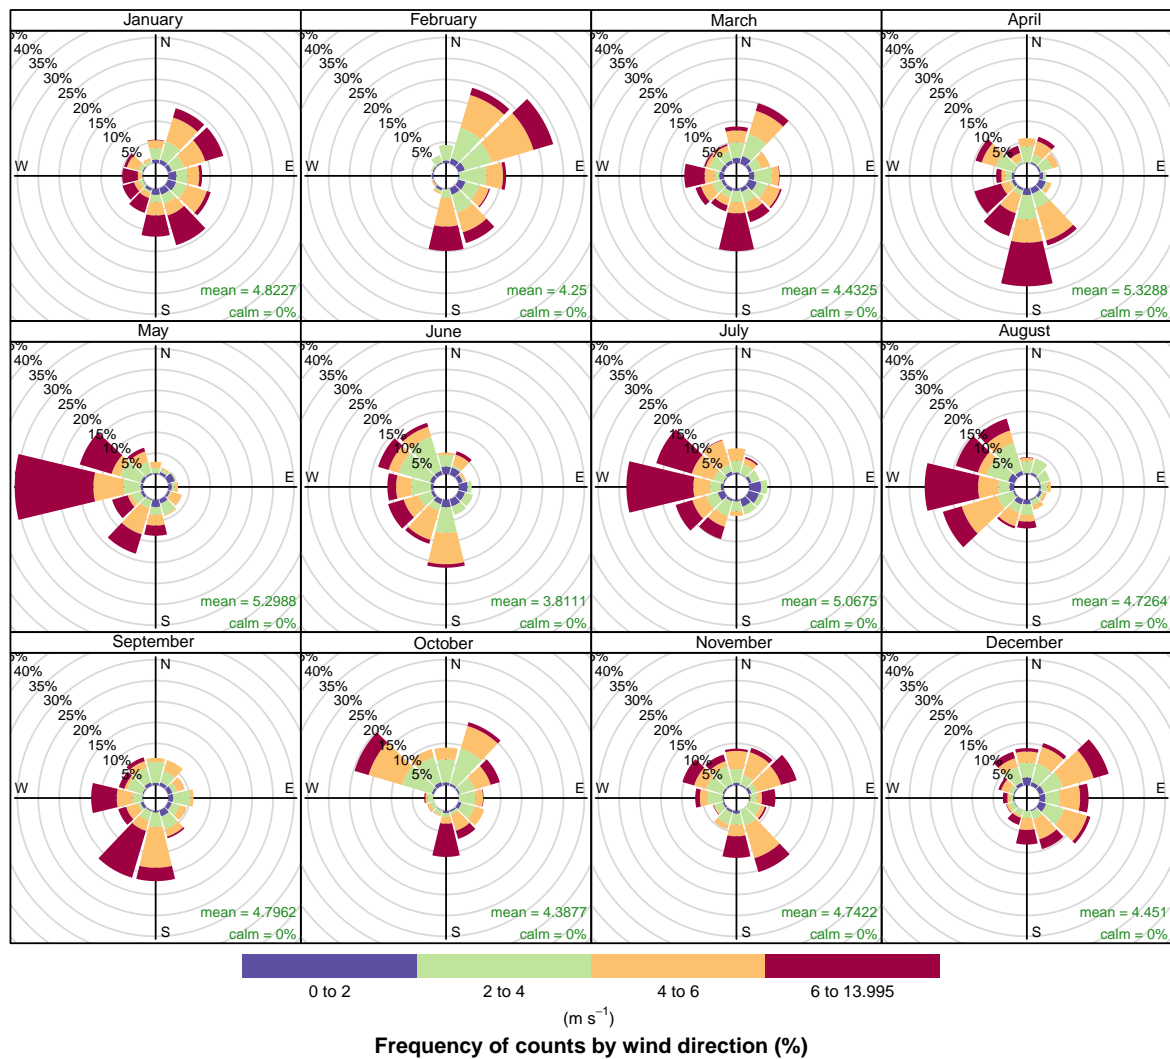

**Figure S11.** Wind rose TCCON Wollongong location for 2015.

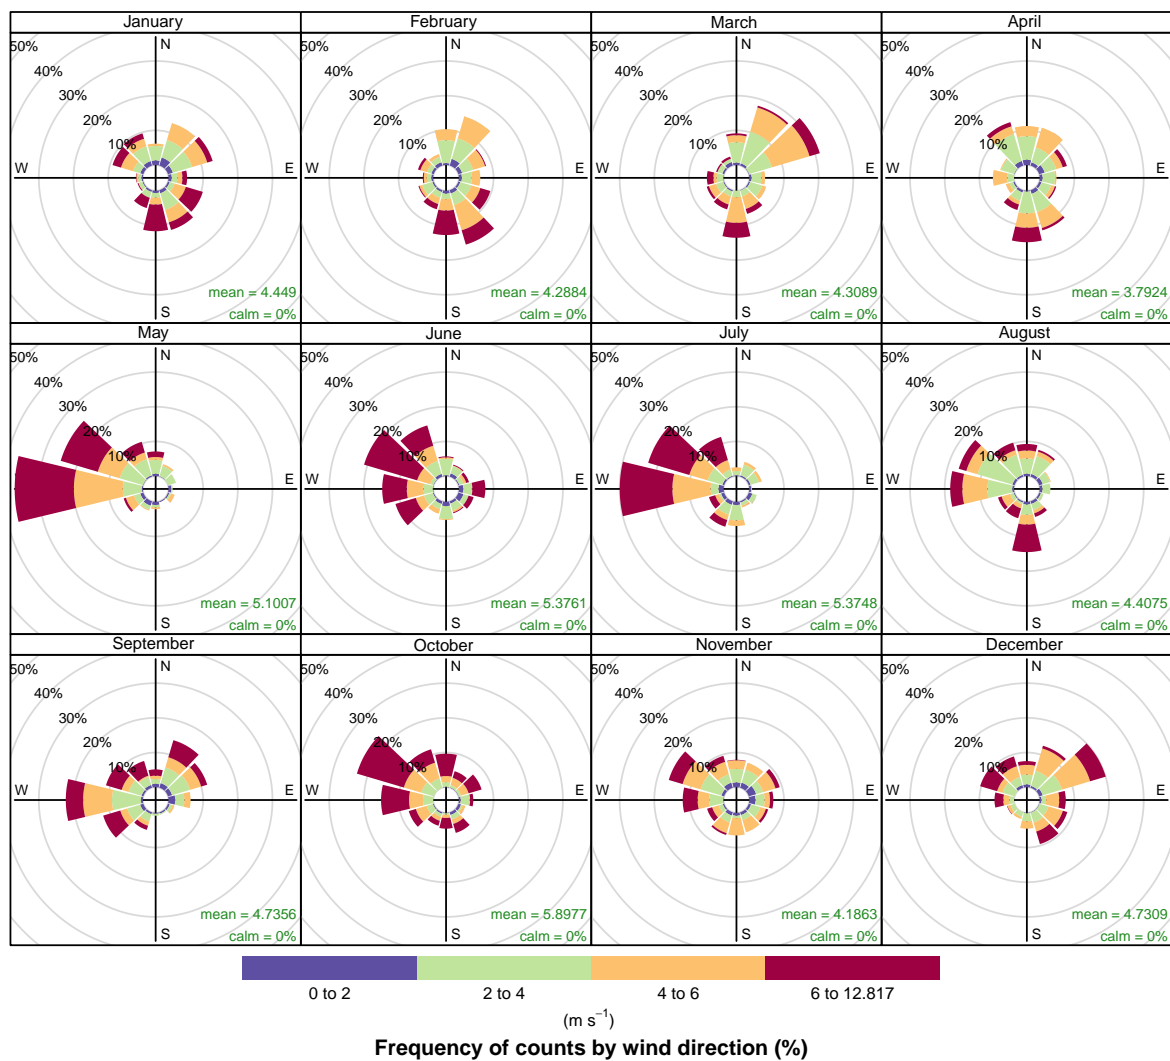

**Figure S12.** Wind rose TCCON Wollongong location for 2016.

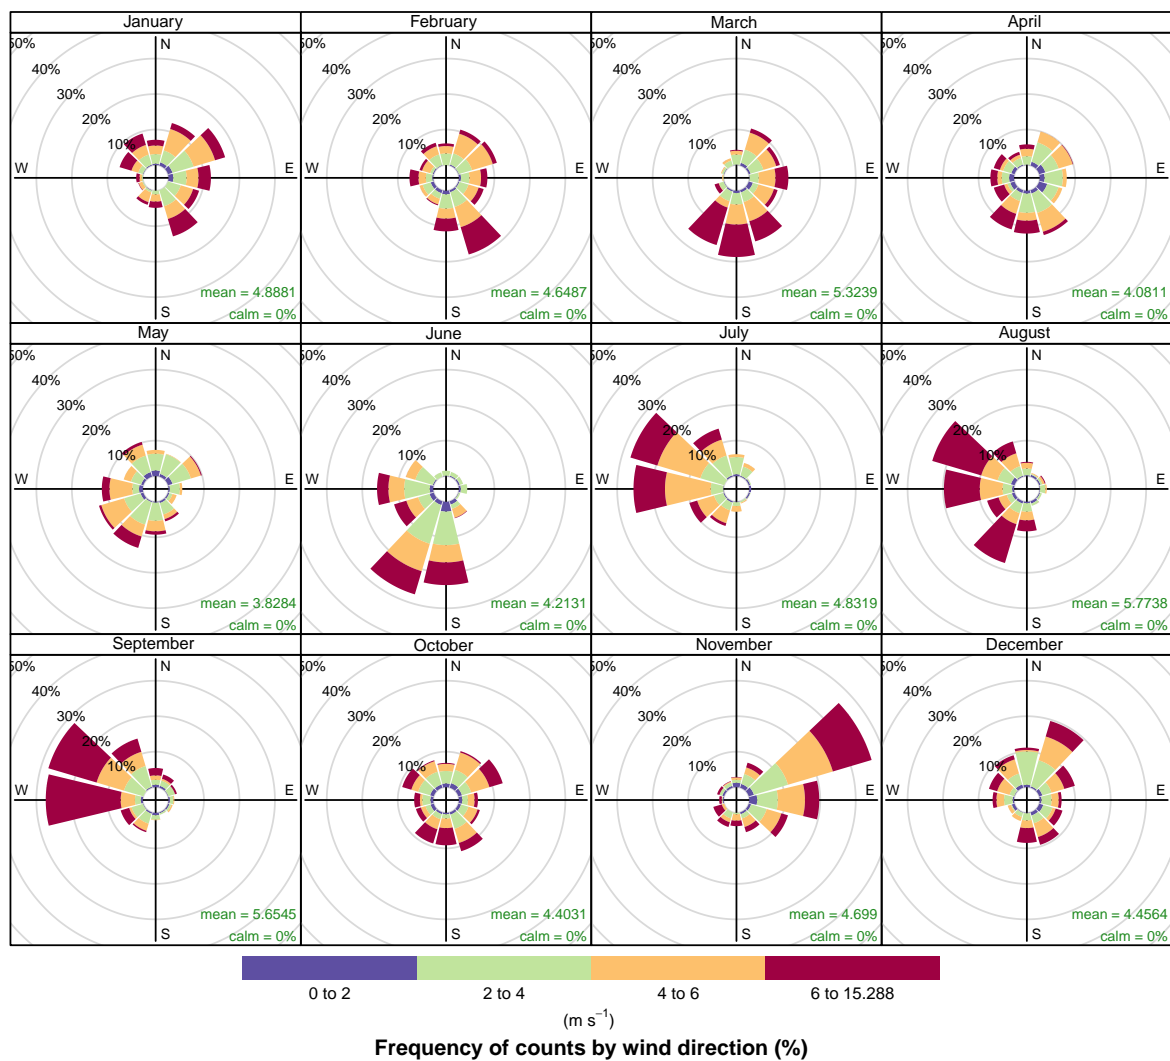

**Figure S13.** Wind rose TCCON Wollongong Location for 2017.

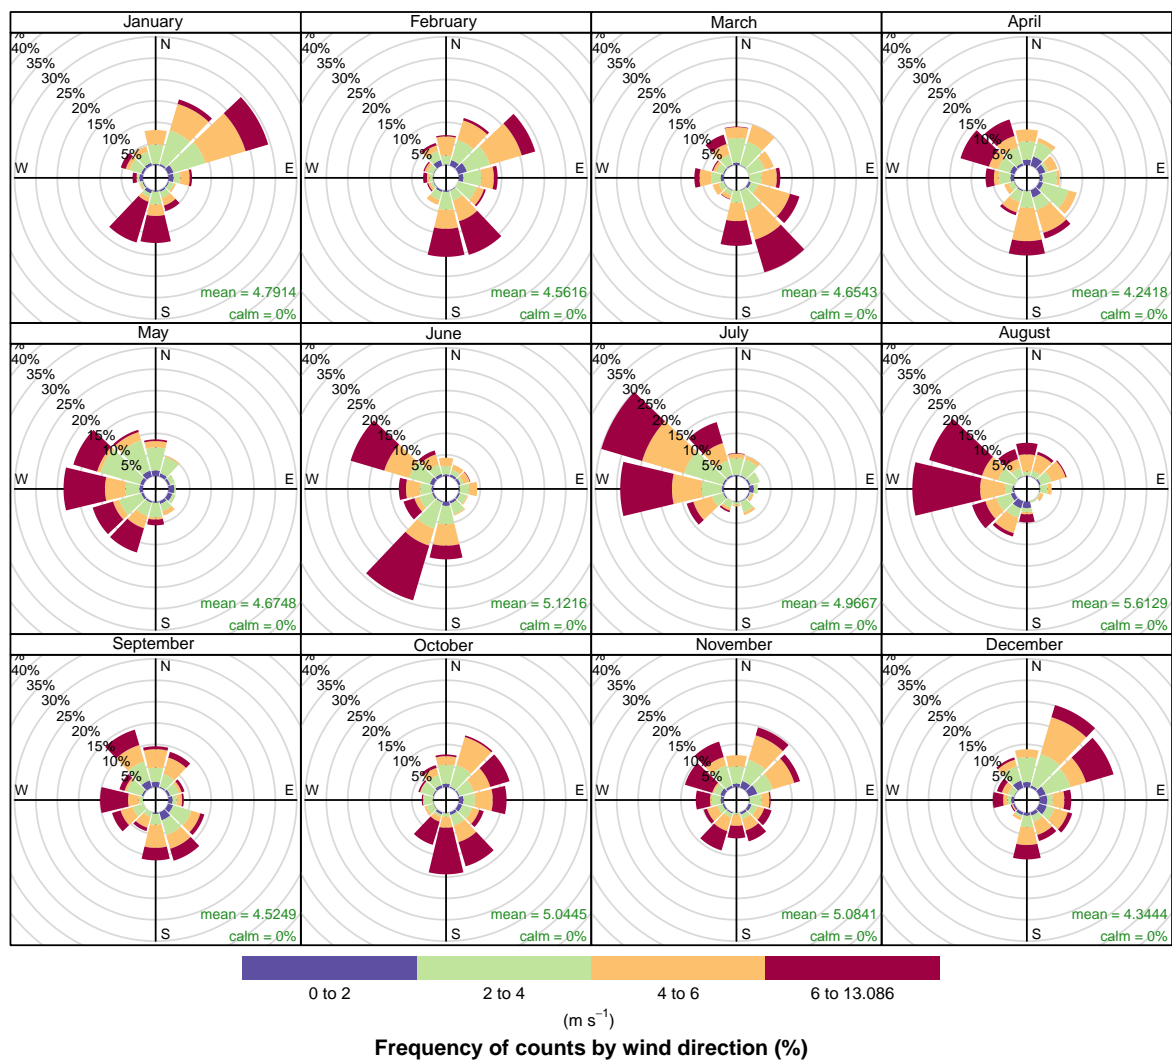

**Figure S14.** Wind rose TCCON Wollongong Location for 2018.

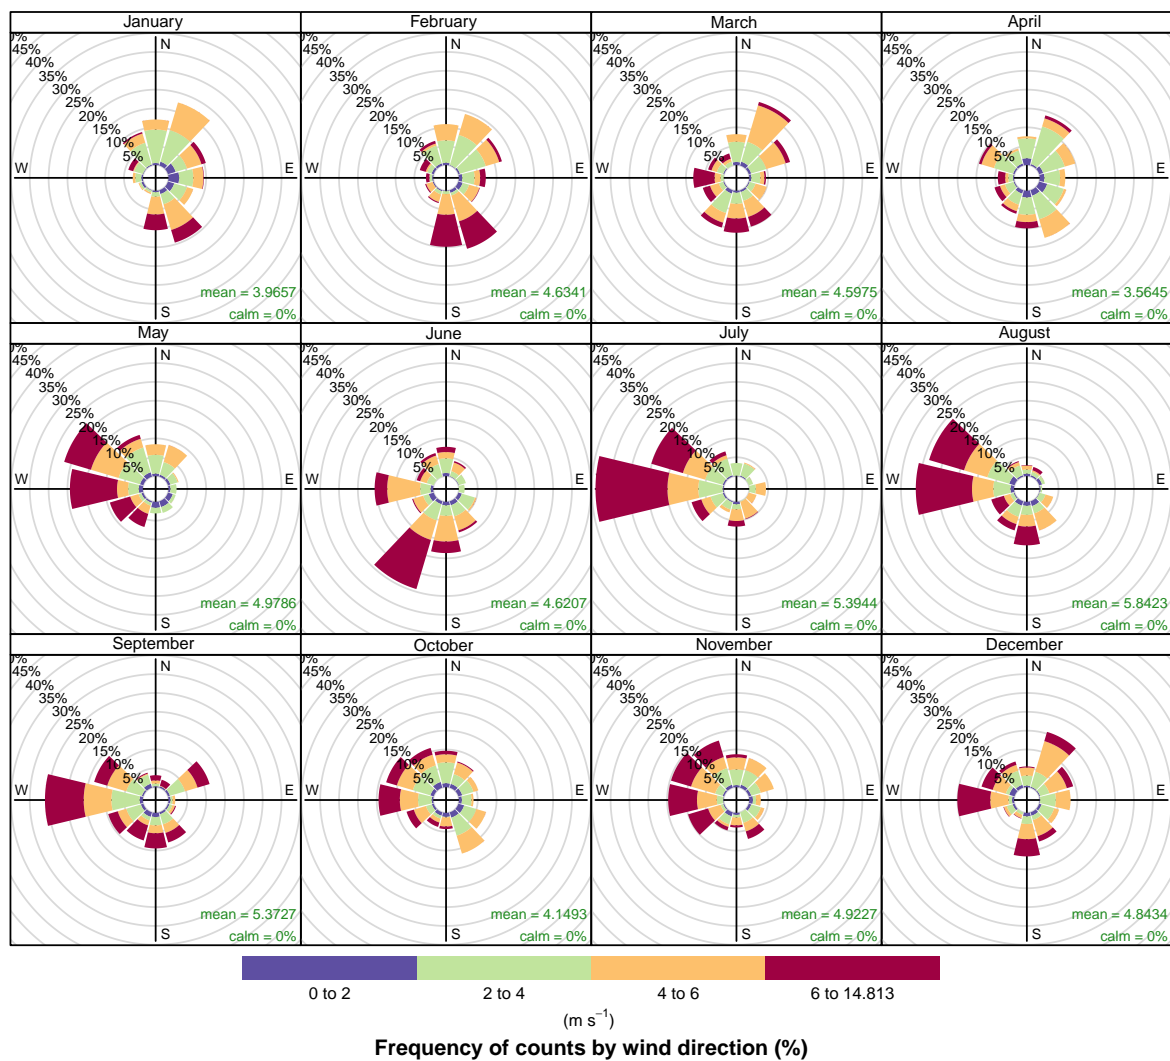

**Figure S15.** Wind rose TCCON Wollongong Location for 2019.

1.2 Wind directions at in-situ sites

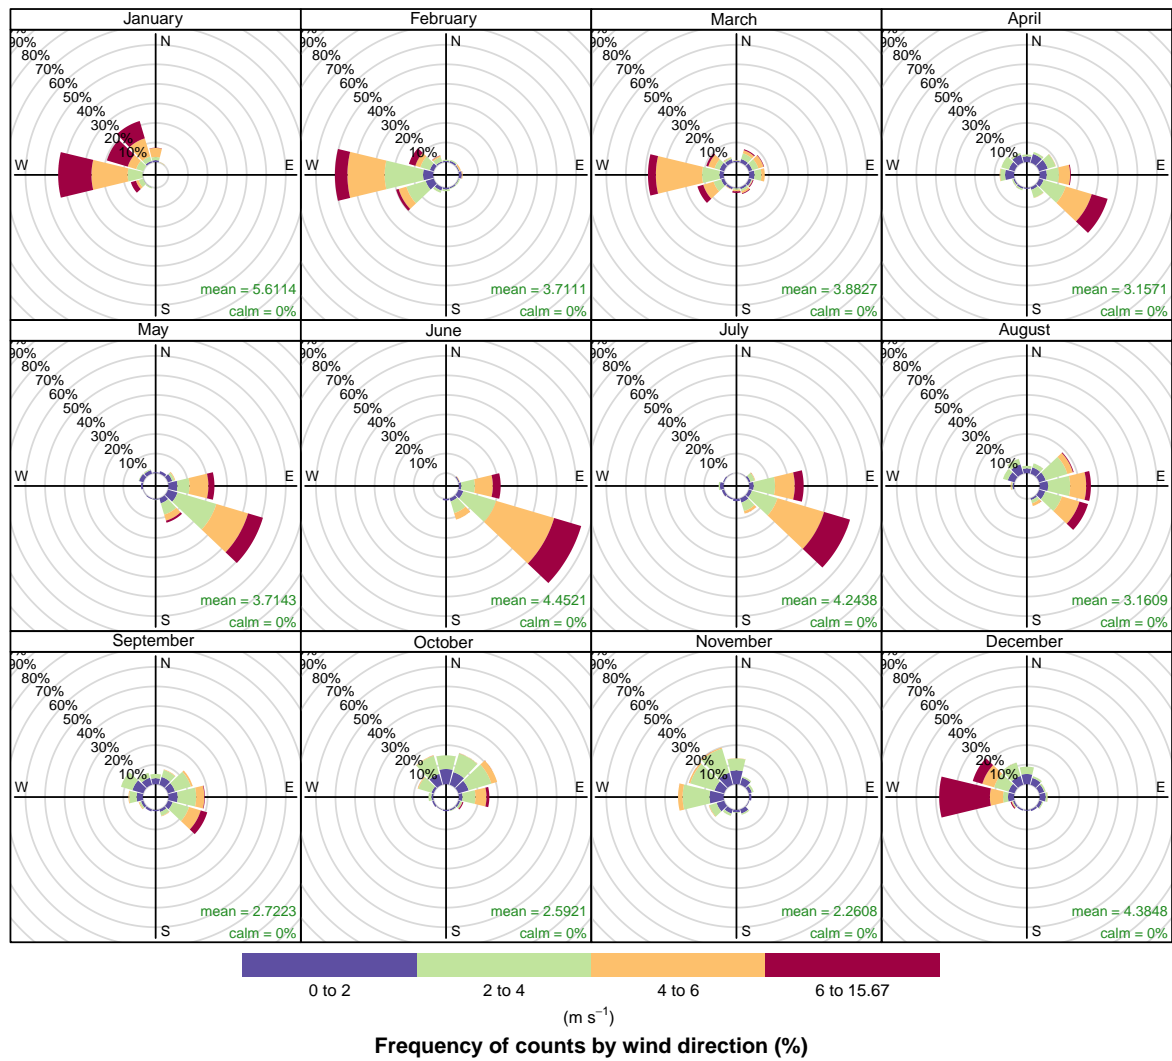

Figure S16. Wind rose Gunn Point location for 2015.



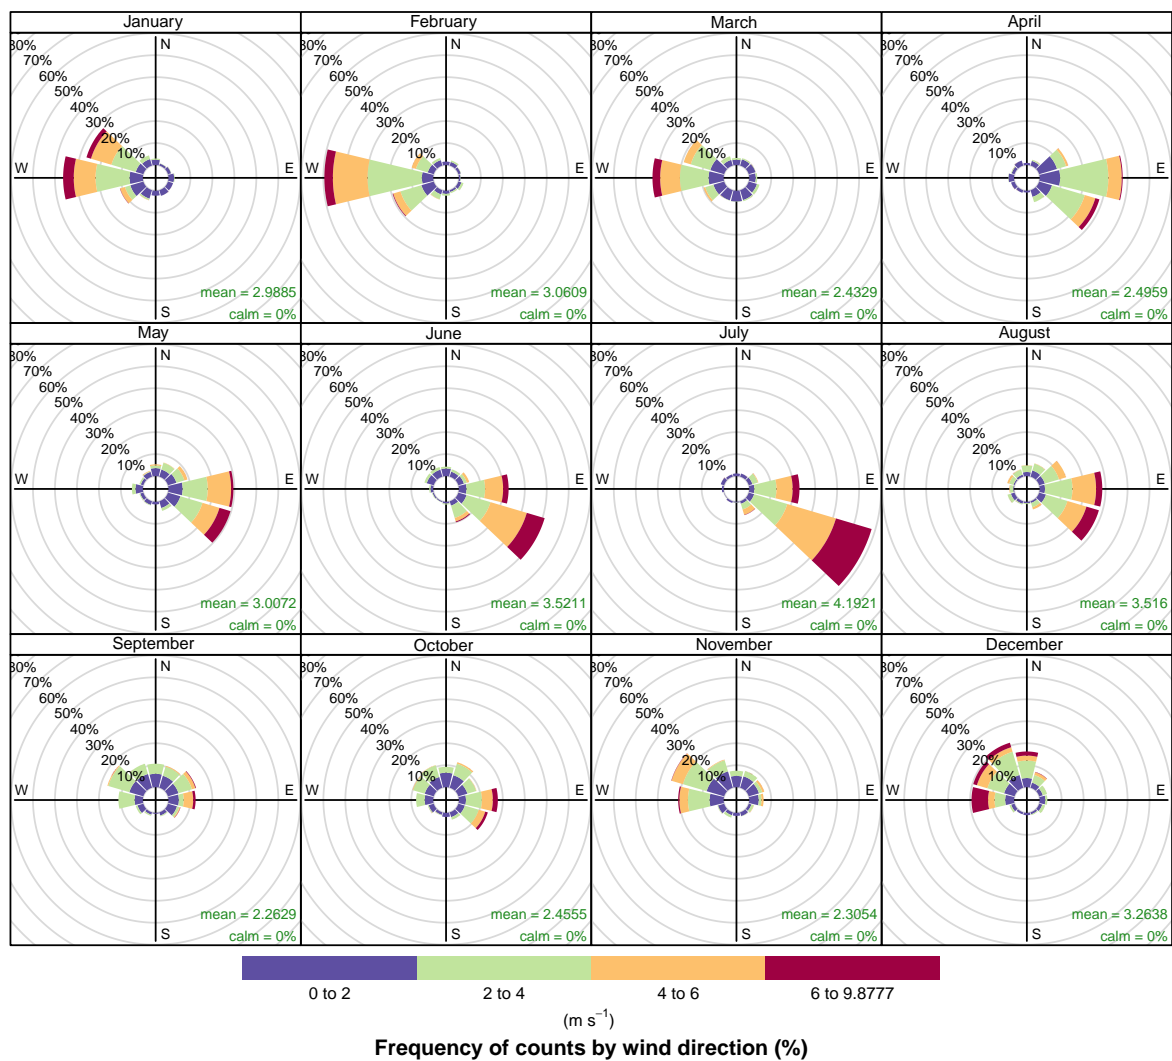

**Figure S17.** Wind rose Gunn Point location for 2016.

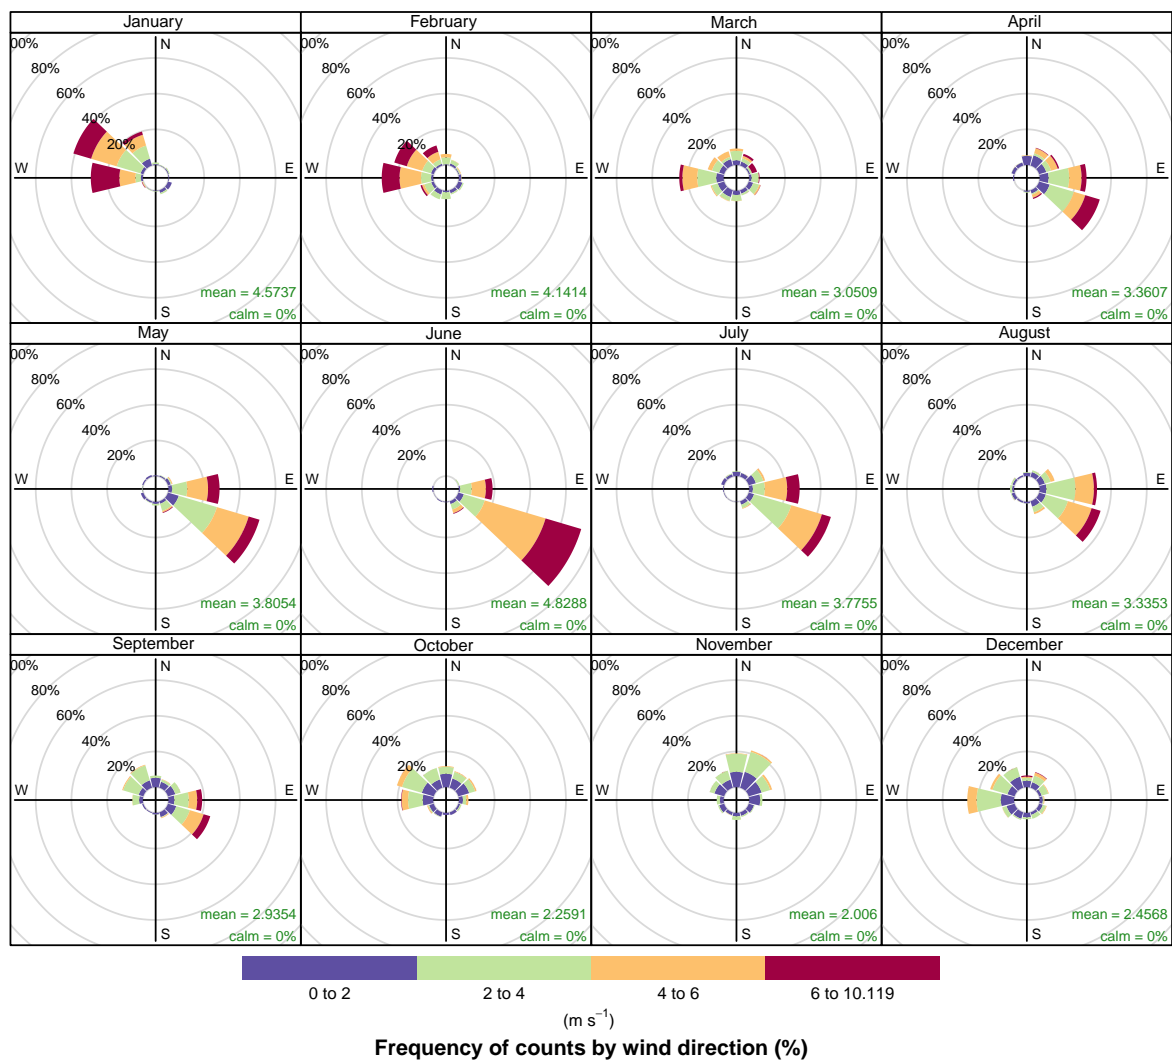

**Figure S18.** Wind rose Gunn Point Location for 2017.

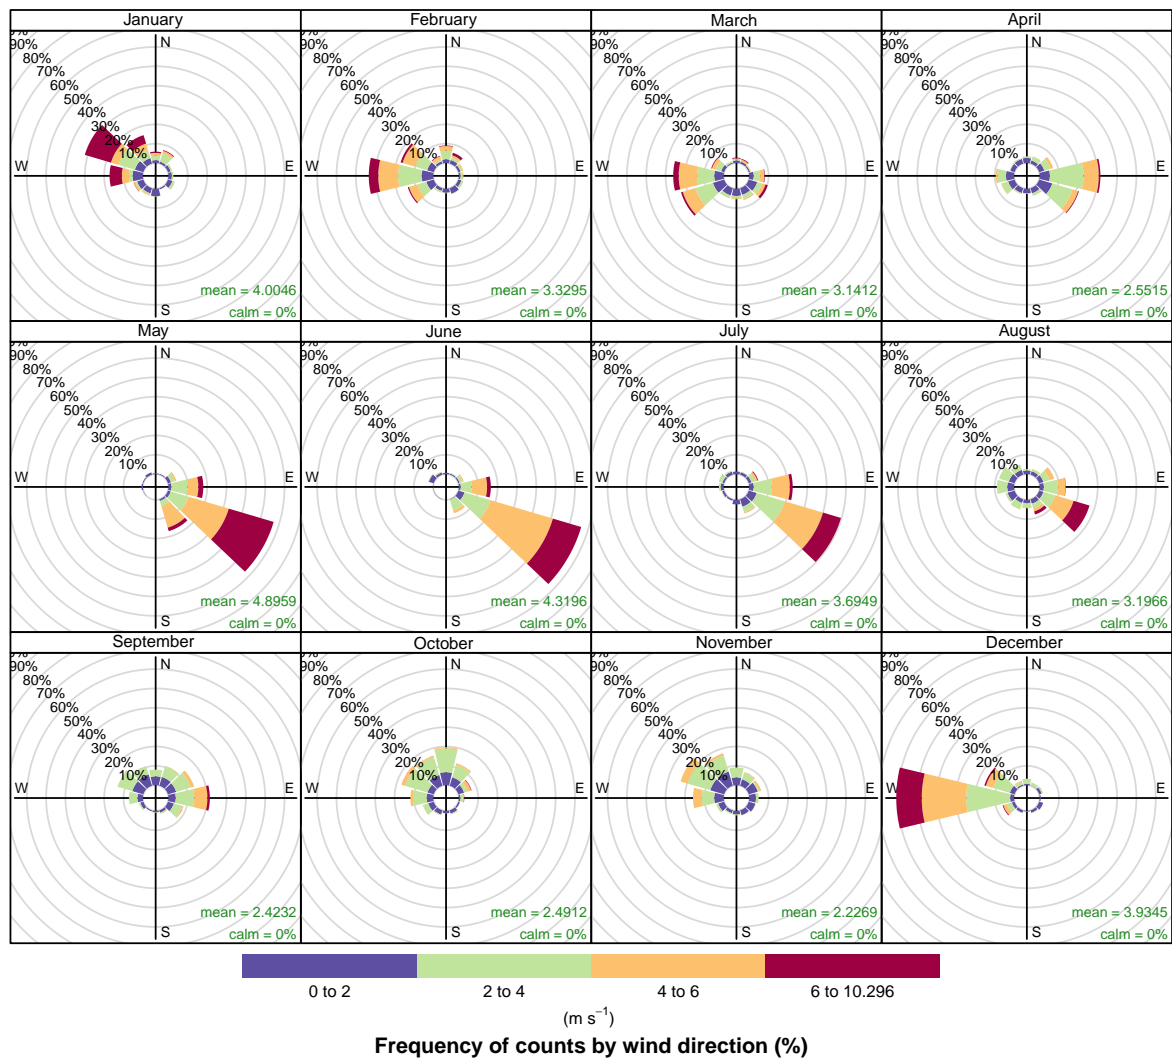

**Figure S19.** Wind rose Gunn Point Location for 2018.

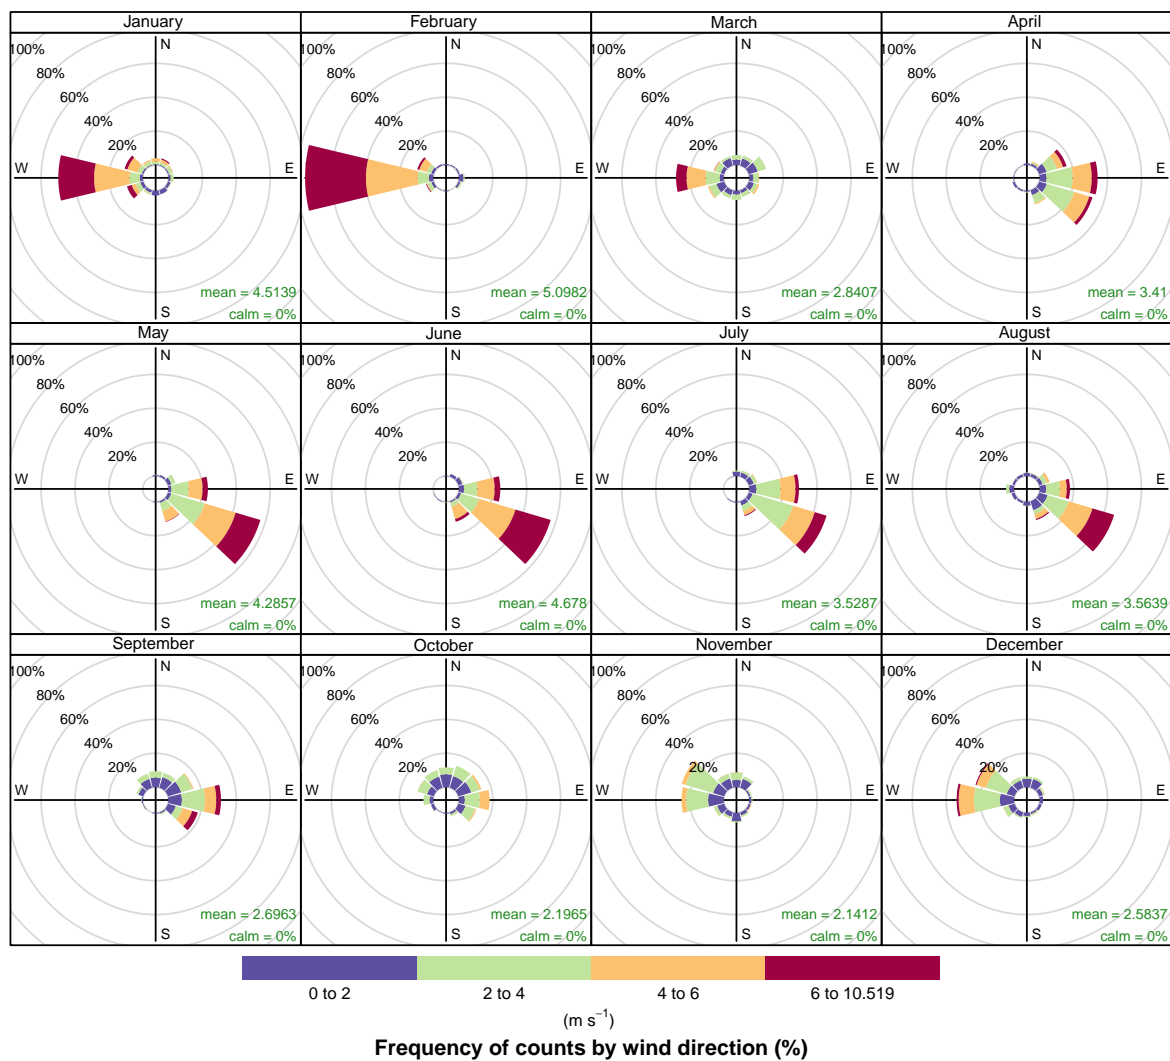

**Figure S20.** Wind rose Gunn Point Location for 2019.

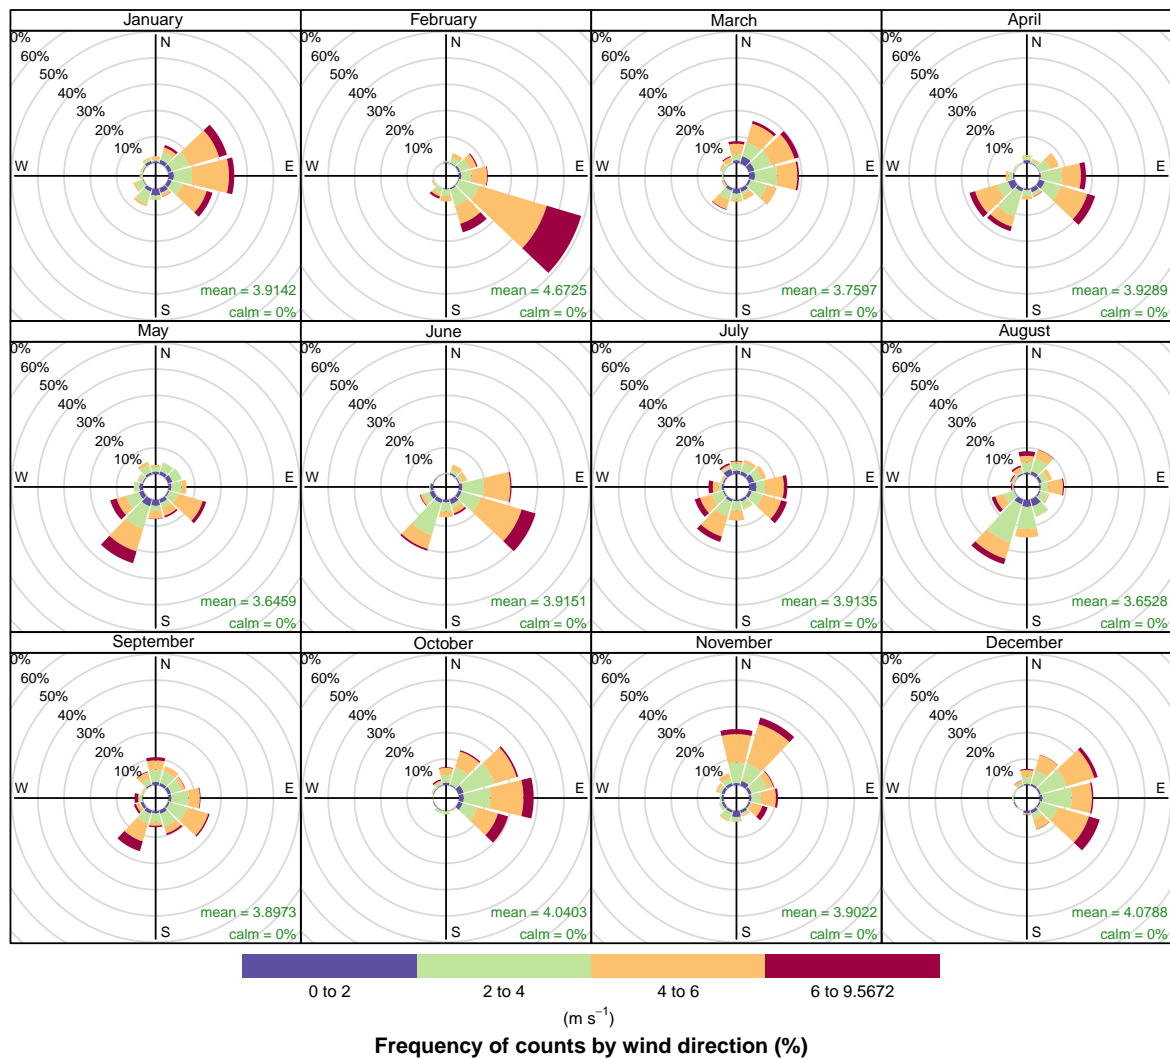

**Figure S21.** Wind rose Burncluith location for 2015.

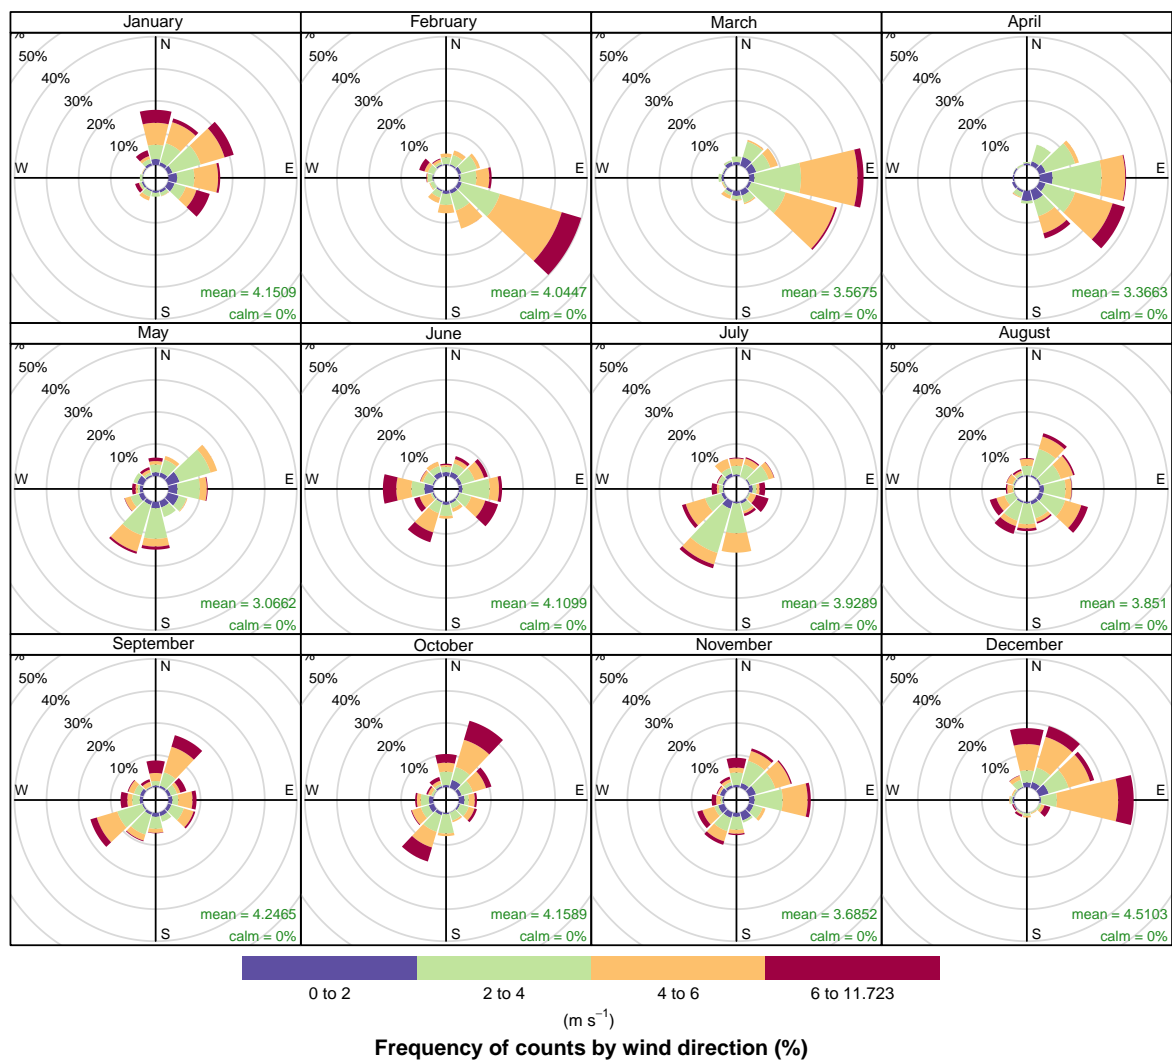

**Figure S22.** Wind rose Burncluith location for 2016.

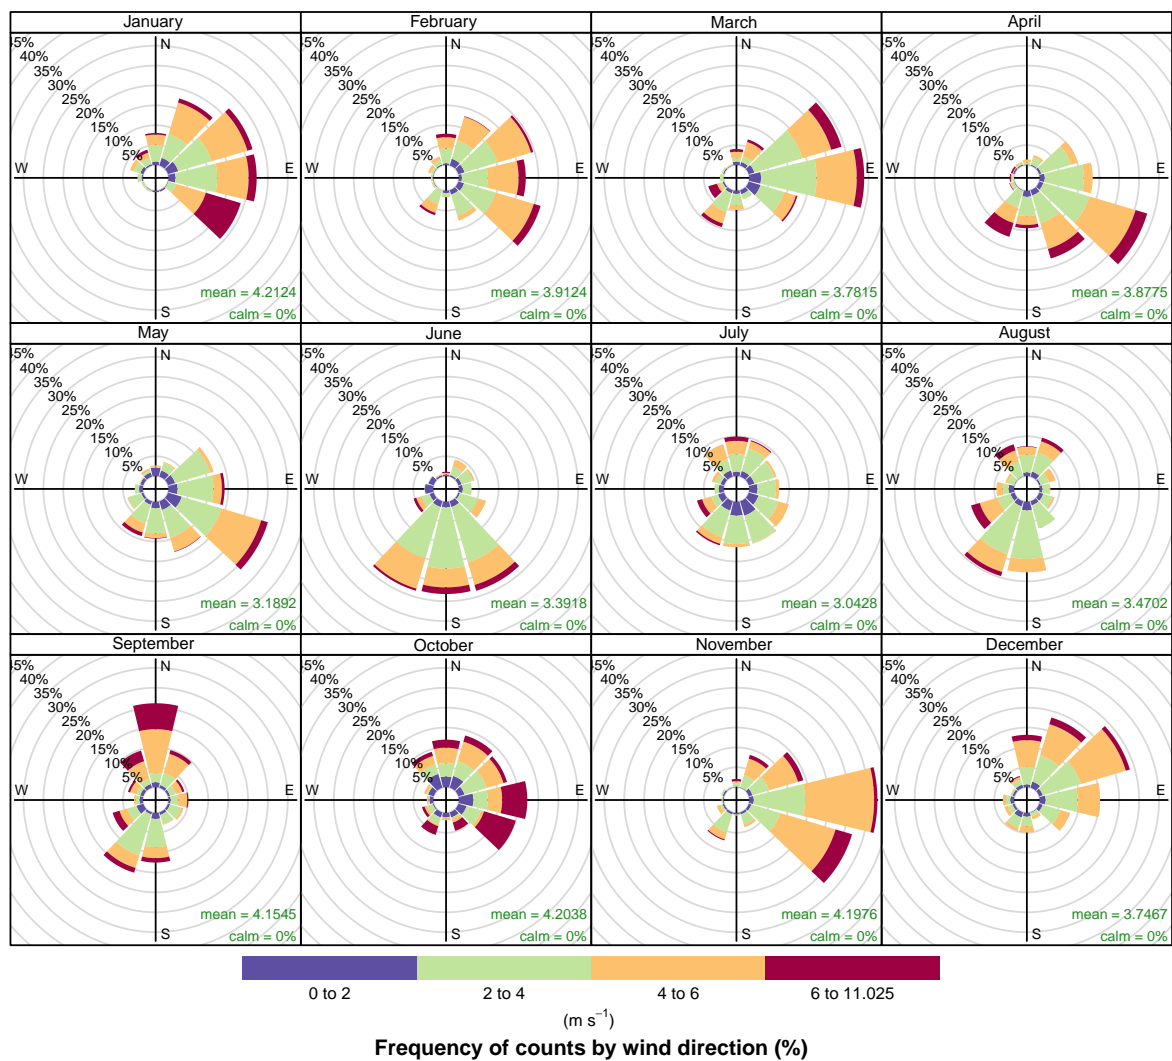

**Figure S23.** Wind rose Burncluith location for 2017.



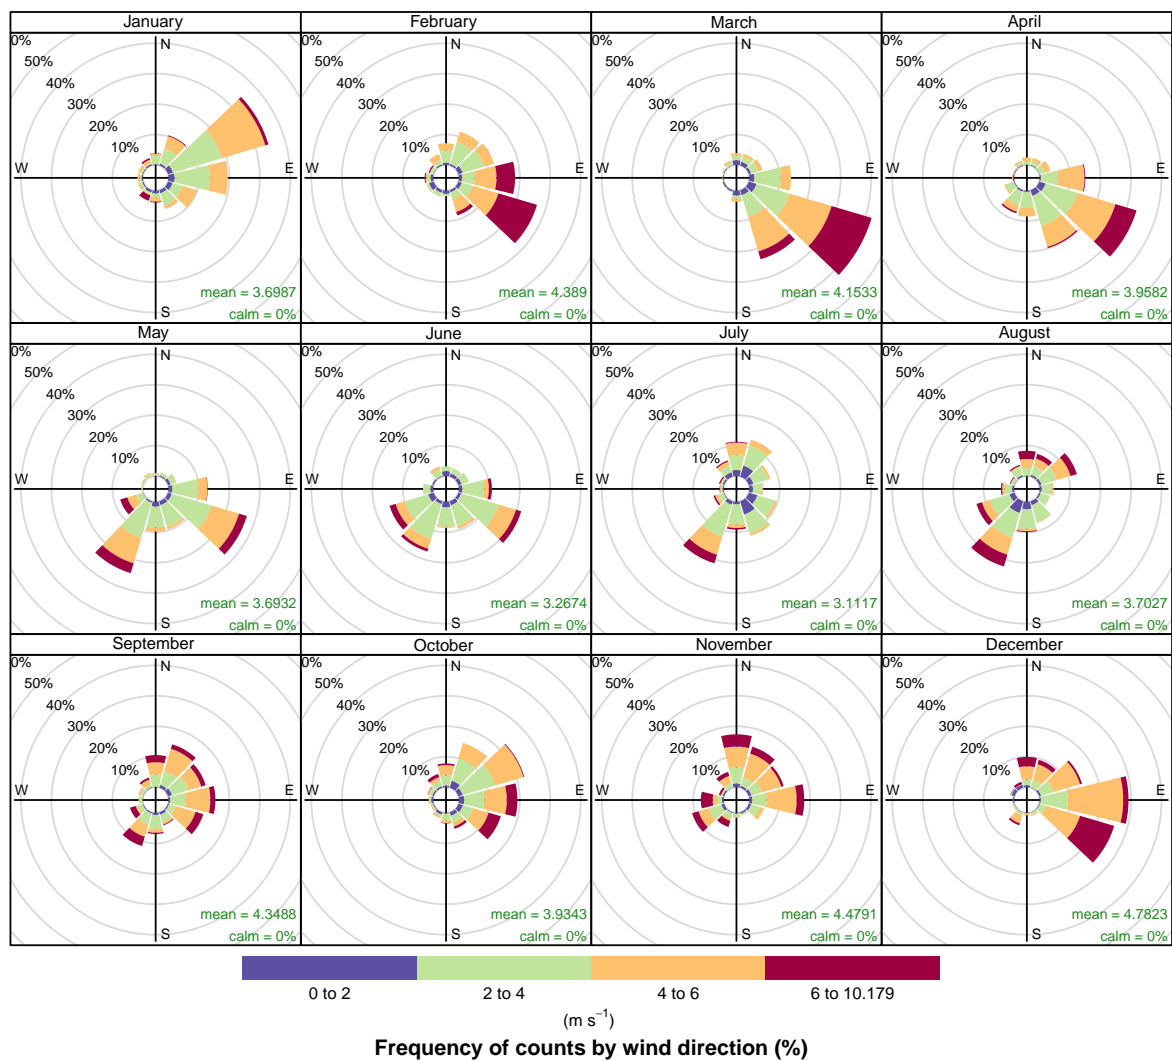

**Figure S24.** Wind rose Burncluith location for 2018.

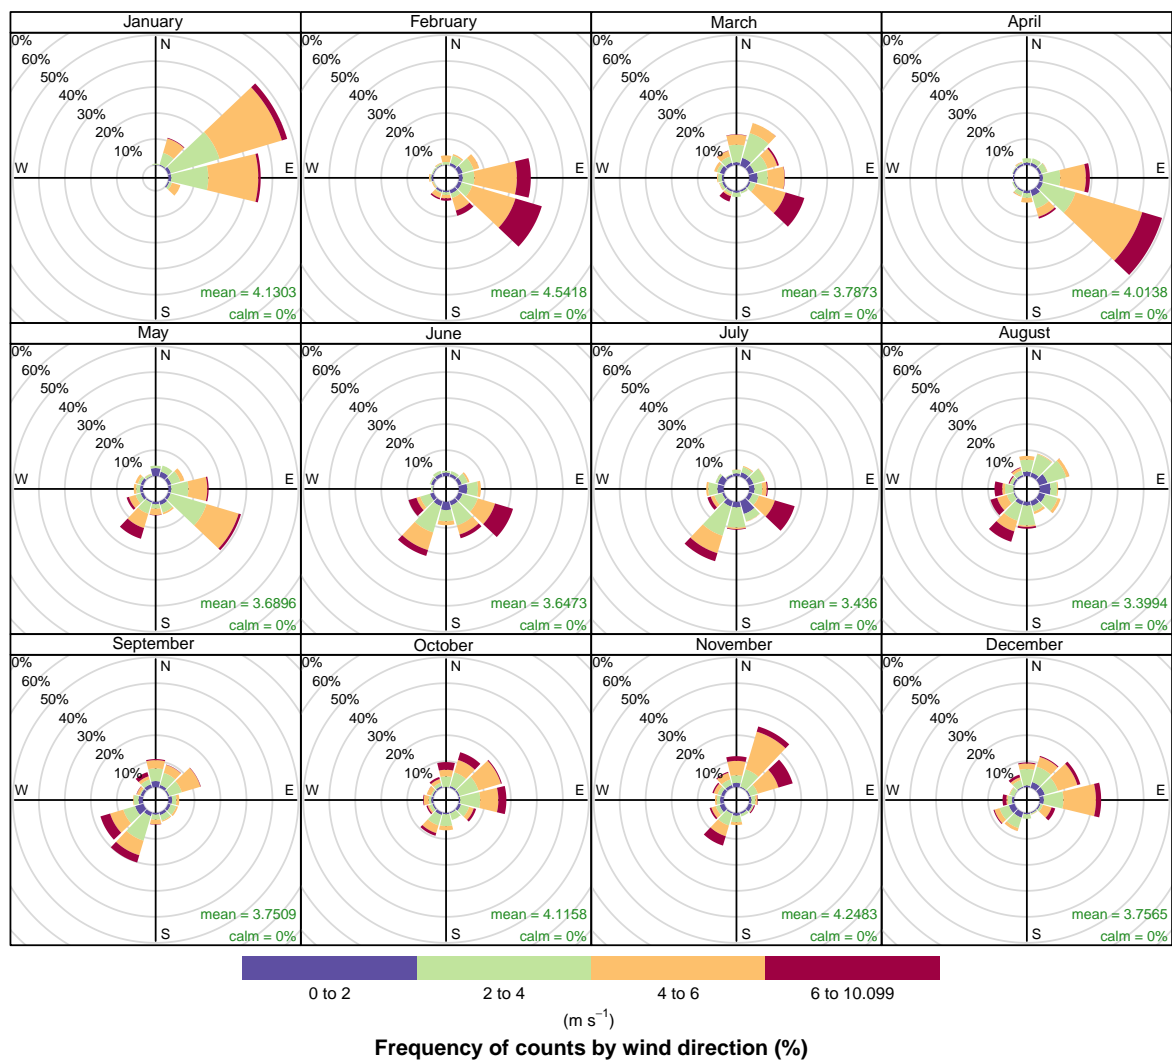

**Figure S25.** Wind rose Ironbark location for 2019.

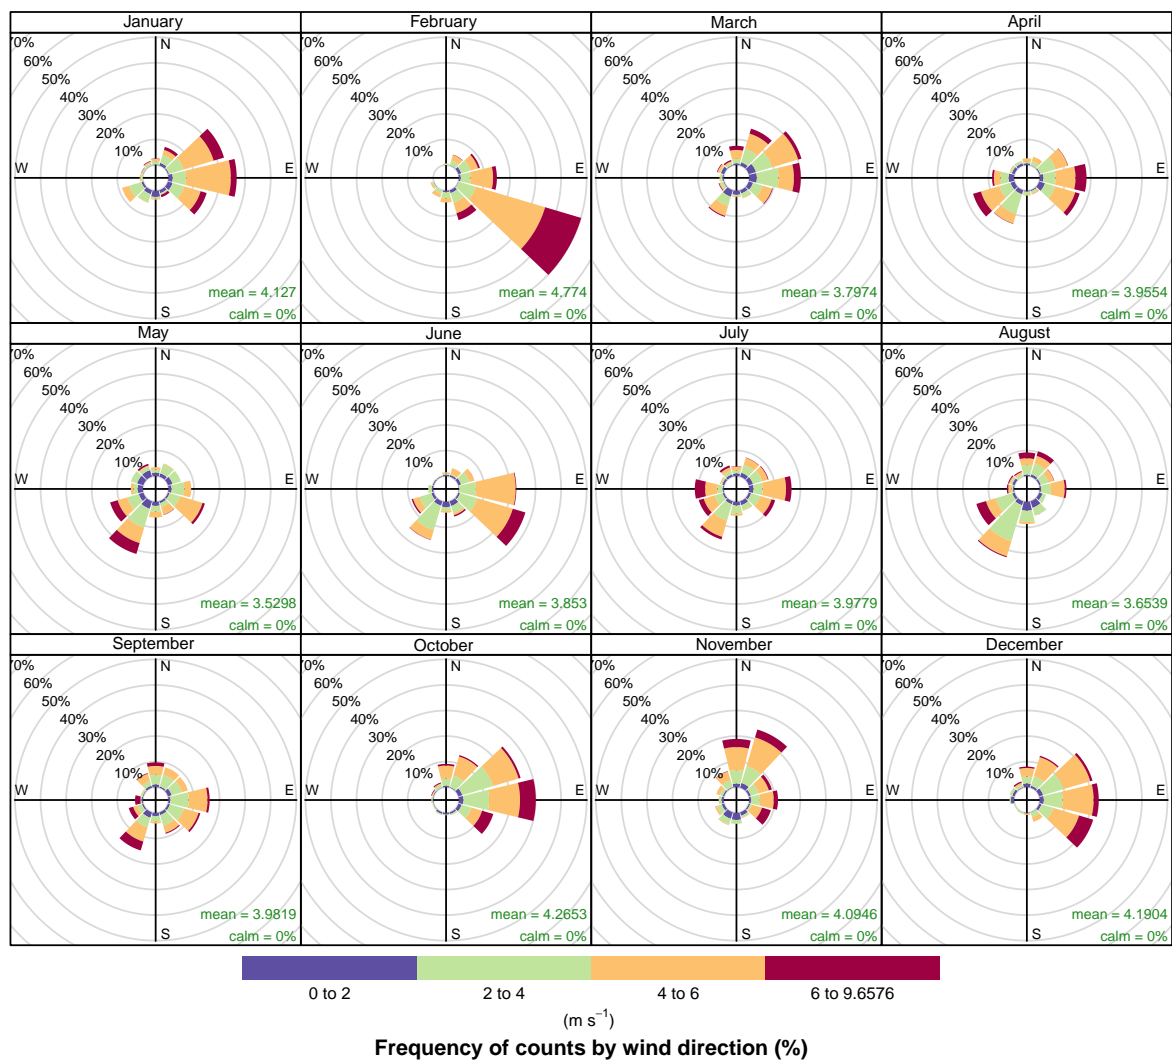

**Figure S26.** Wind rose Ironbark location for 2015.

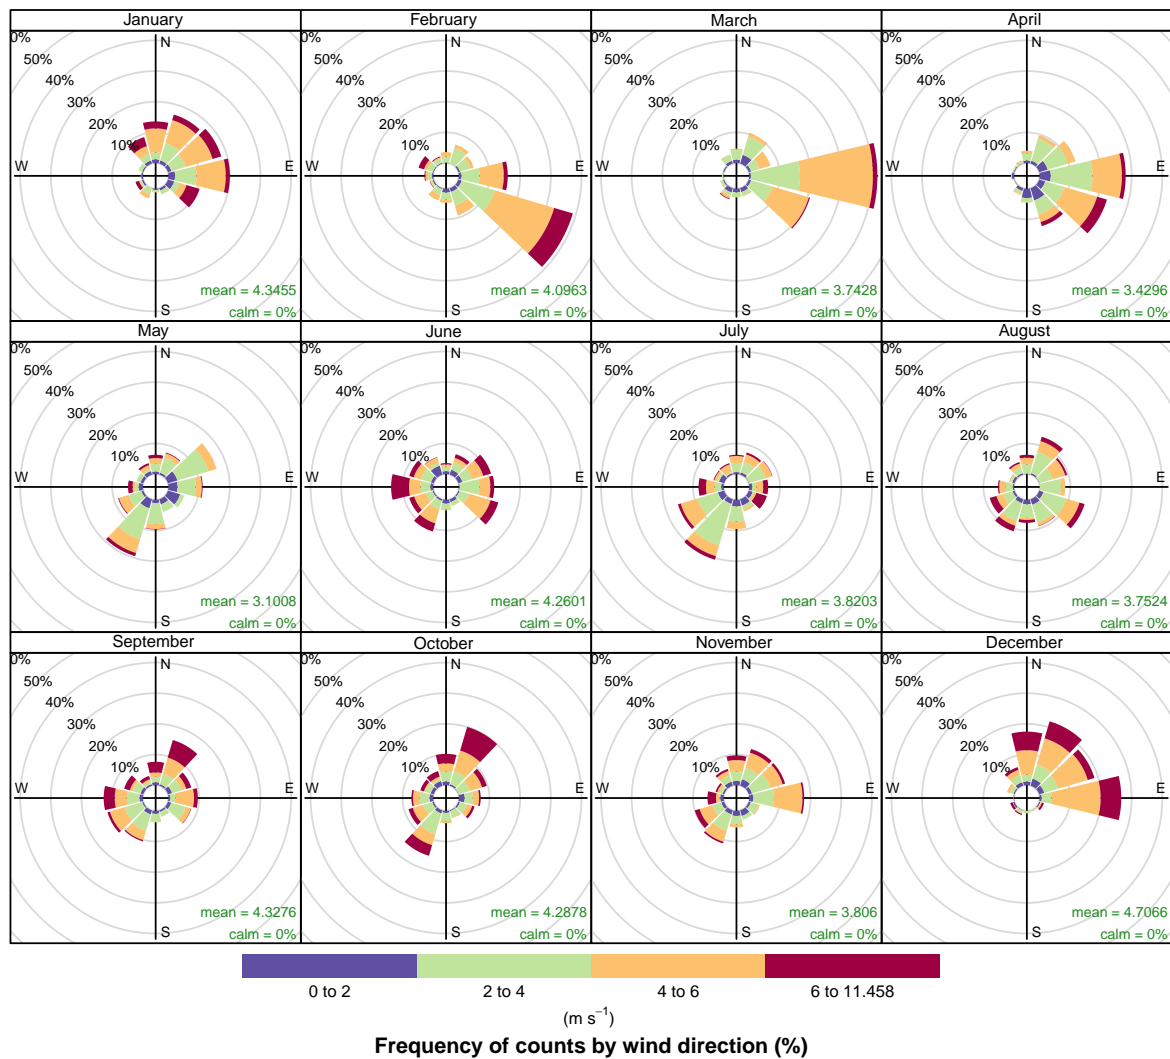

**Figure S27.** Wind rose Ironbark location for 2016.

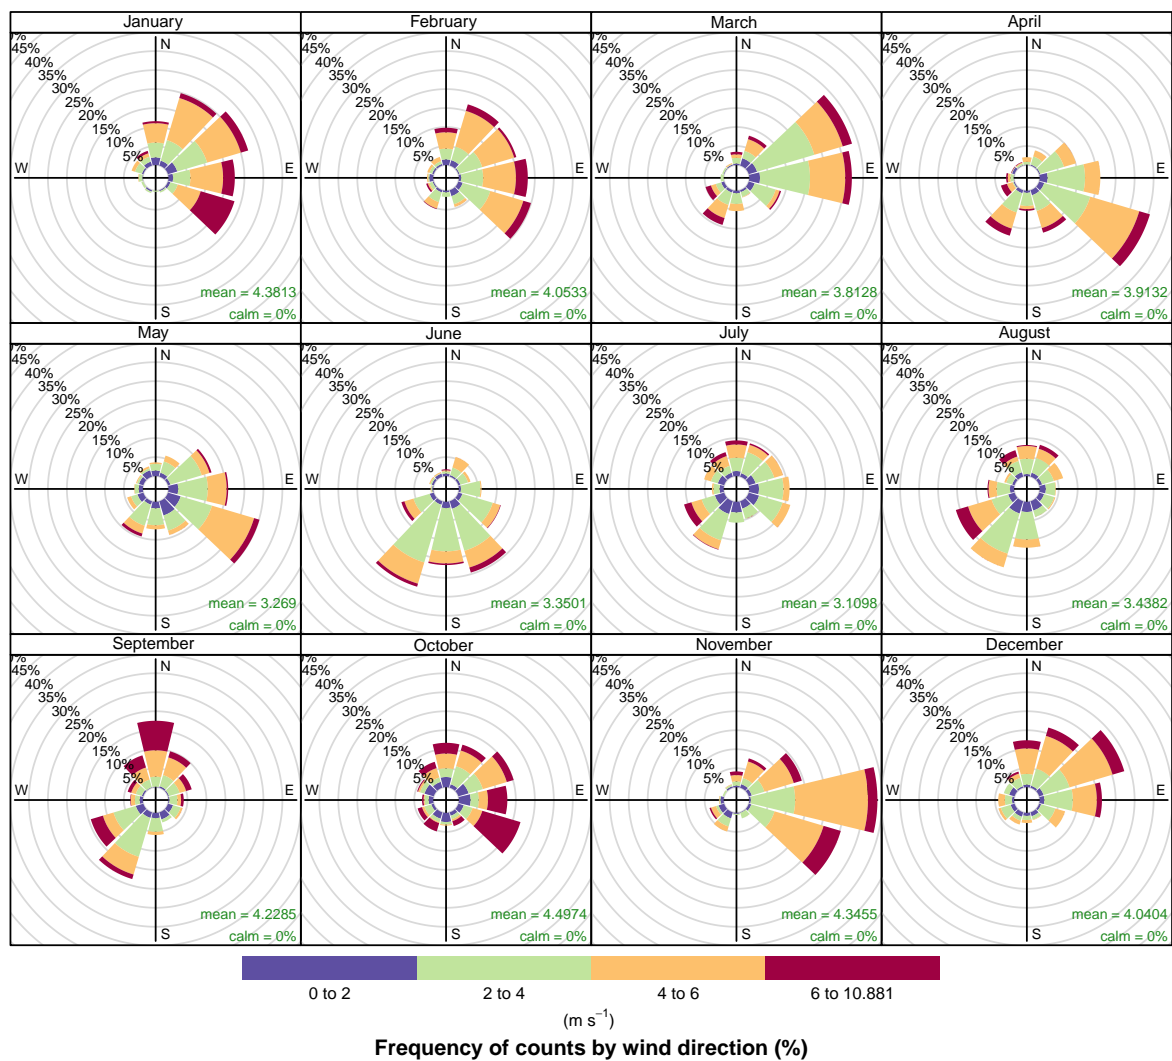

**Figure S28.** Wind rose Ironbark location for 2017.

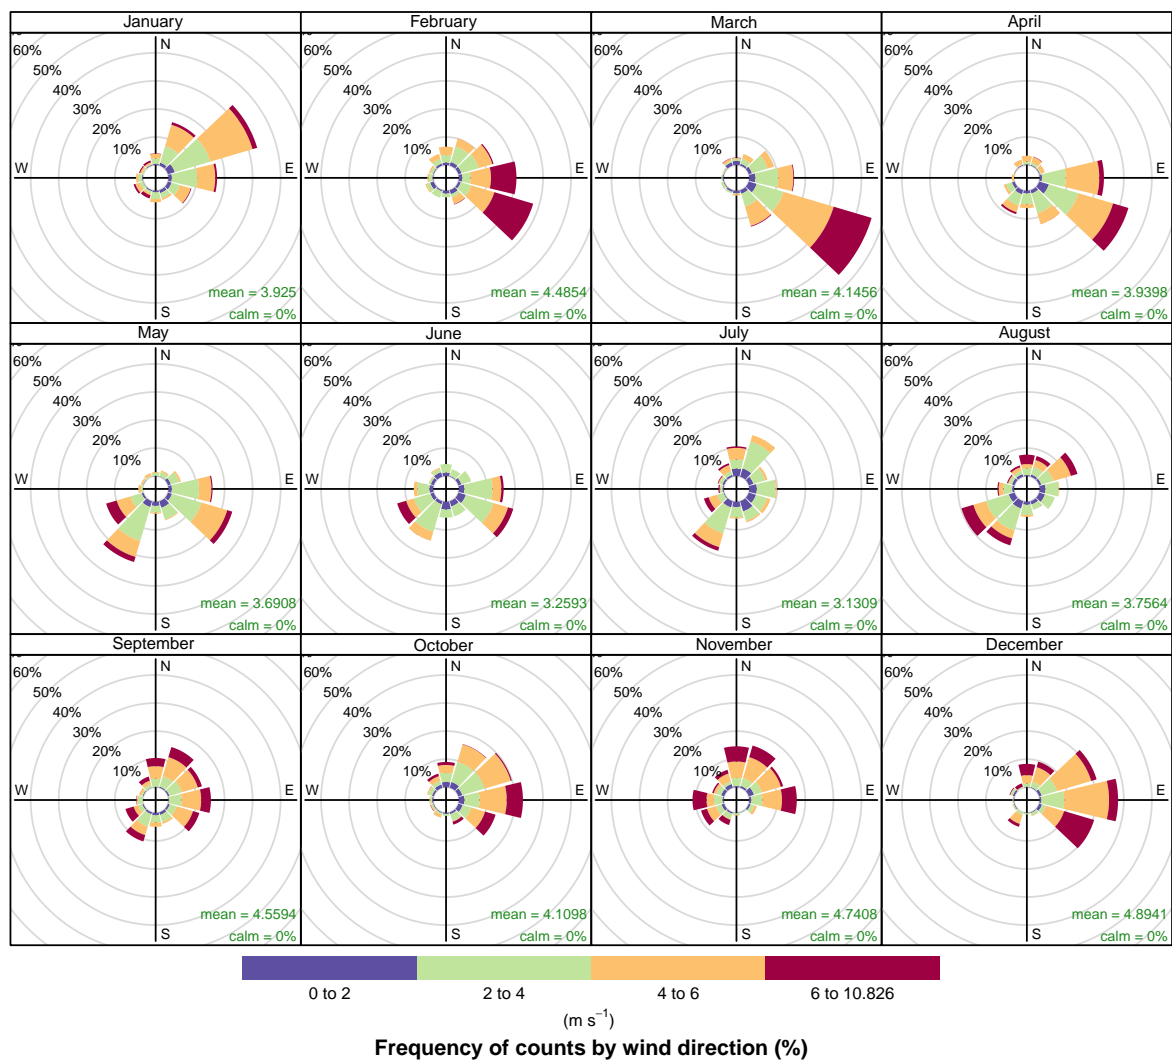

**Figure S29.** Wind rose Ironbark location for 2018.

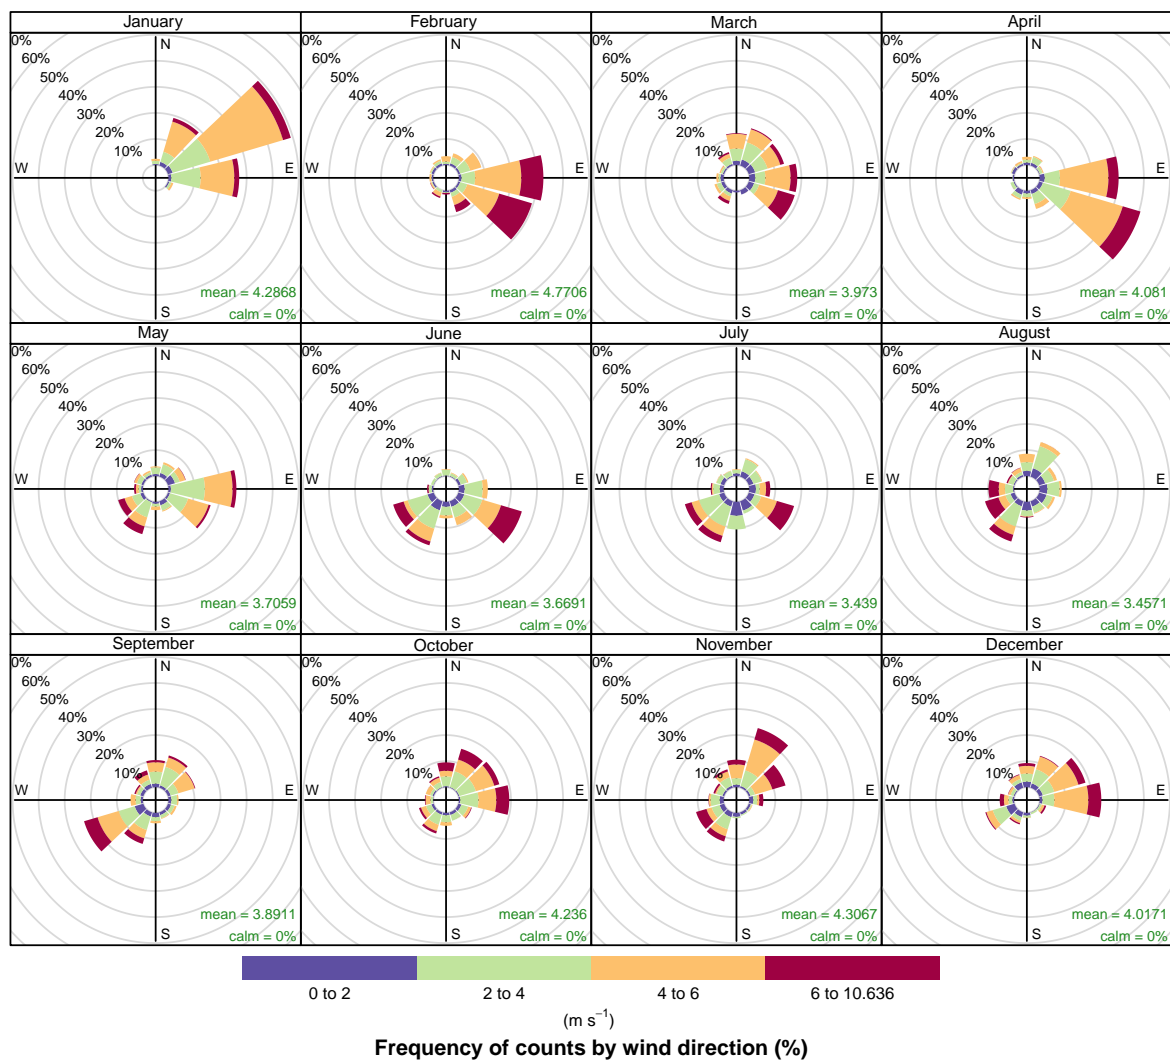

**Figure S30.** Wind rose Ironbark location for 2019.



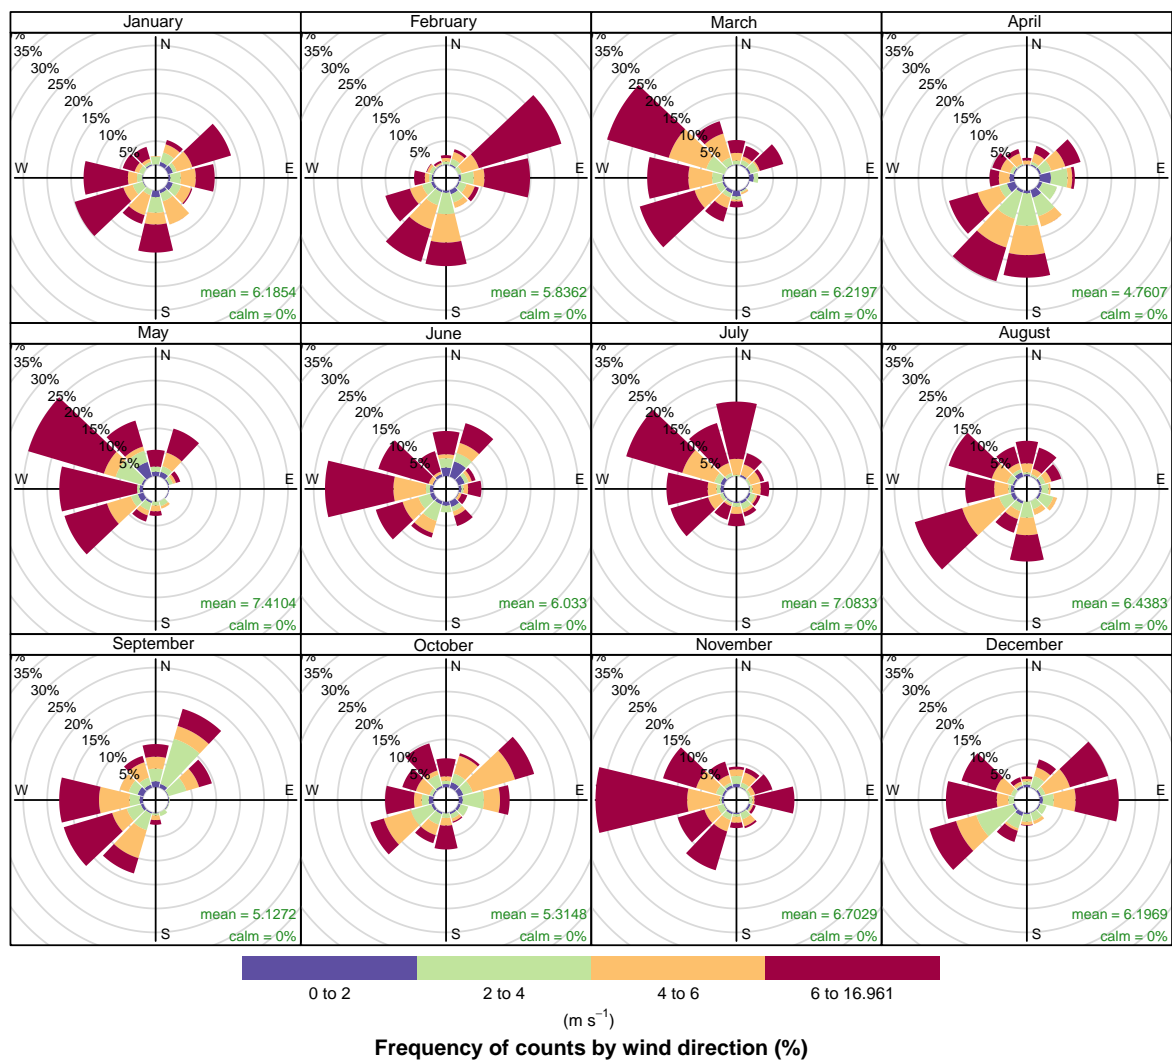

**Figure S31.** Wind rose Cape Grim location for 2015.

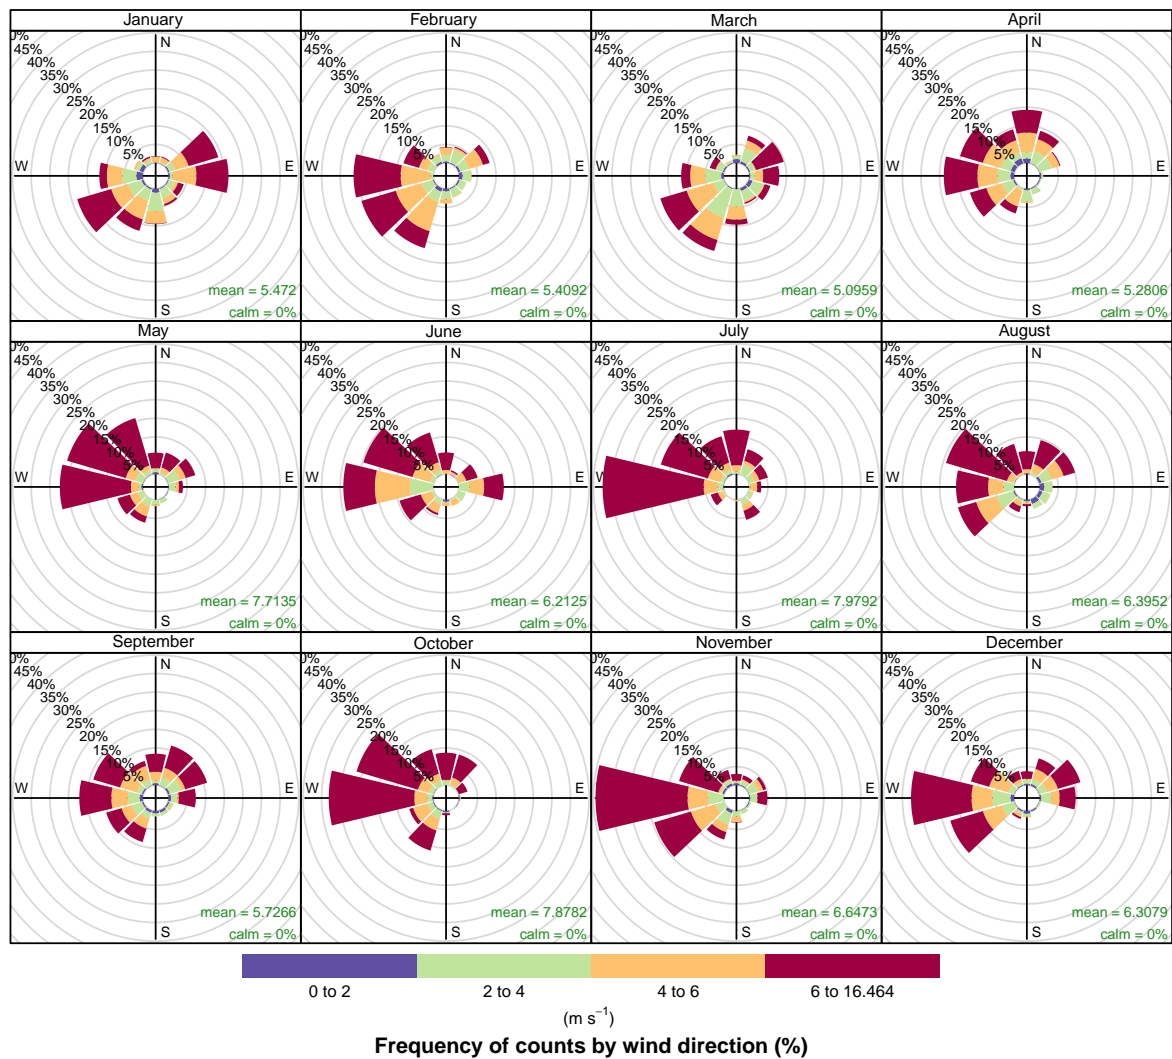

**Figure S32.** Wind rose Cape Grim location for 2016.

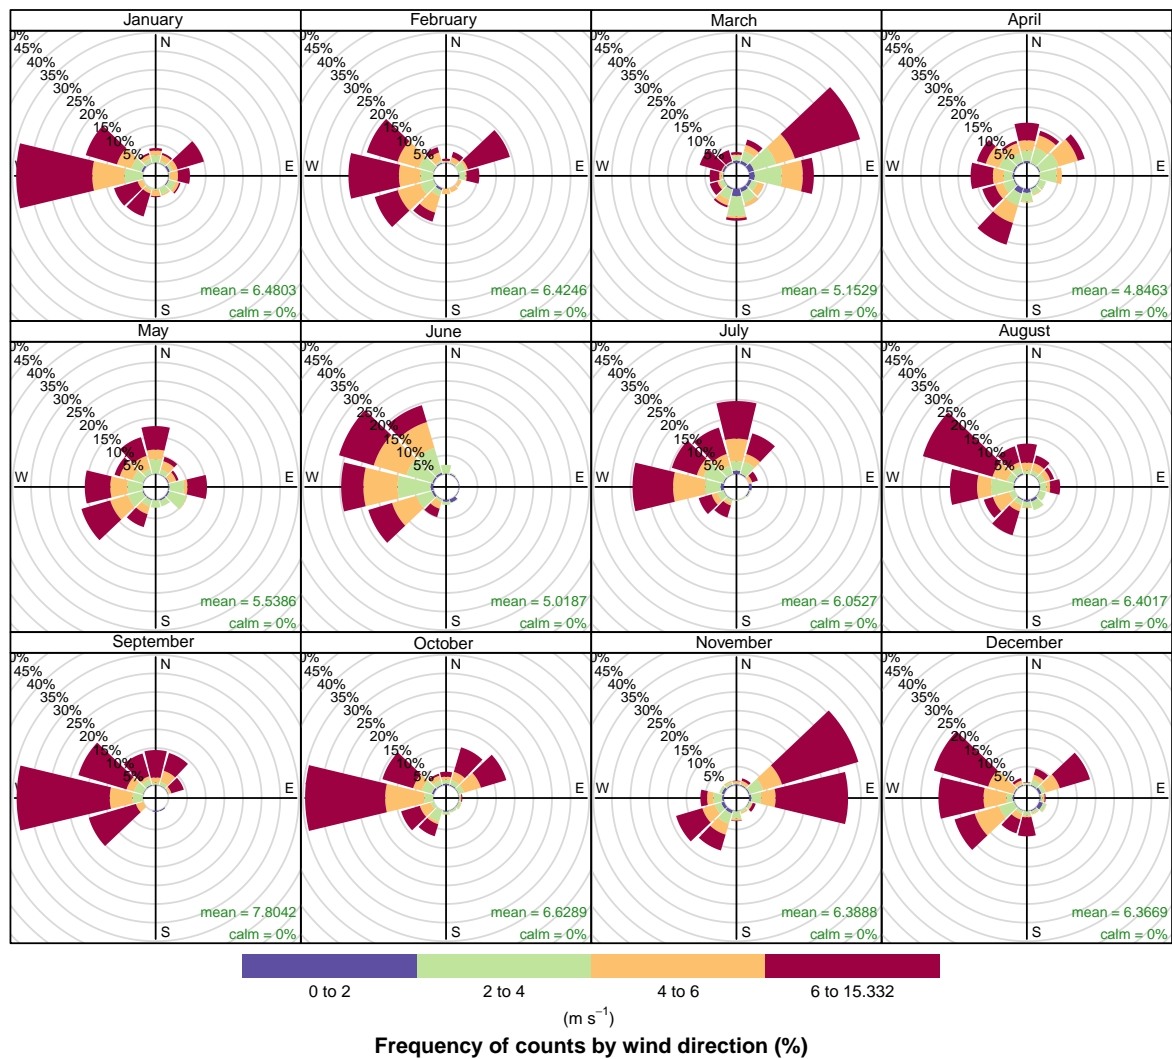

**Figure S33.** Wind rose Cape Grim location for 2017.

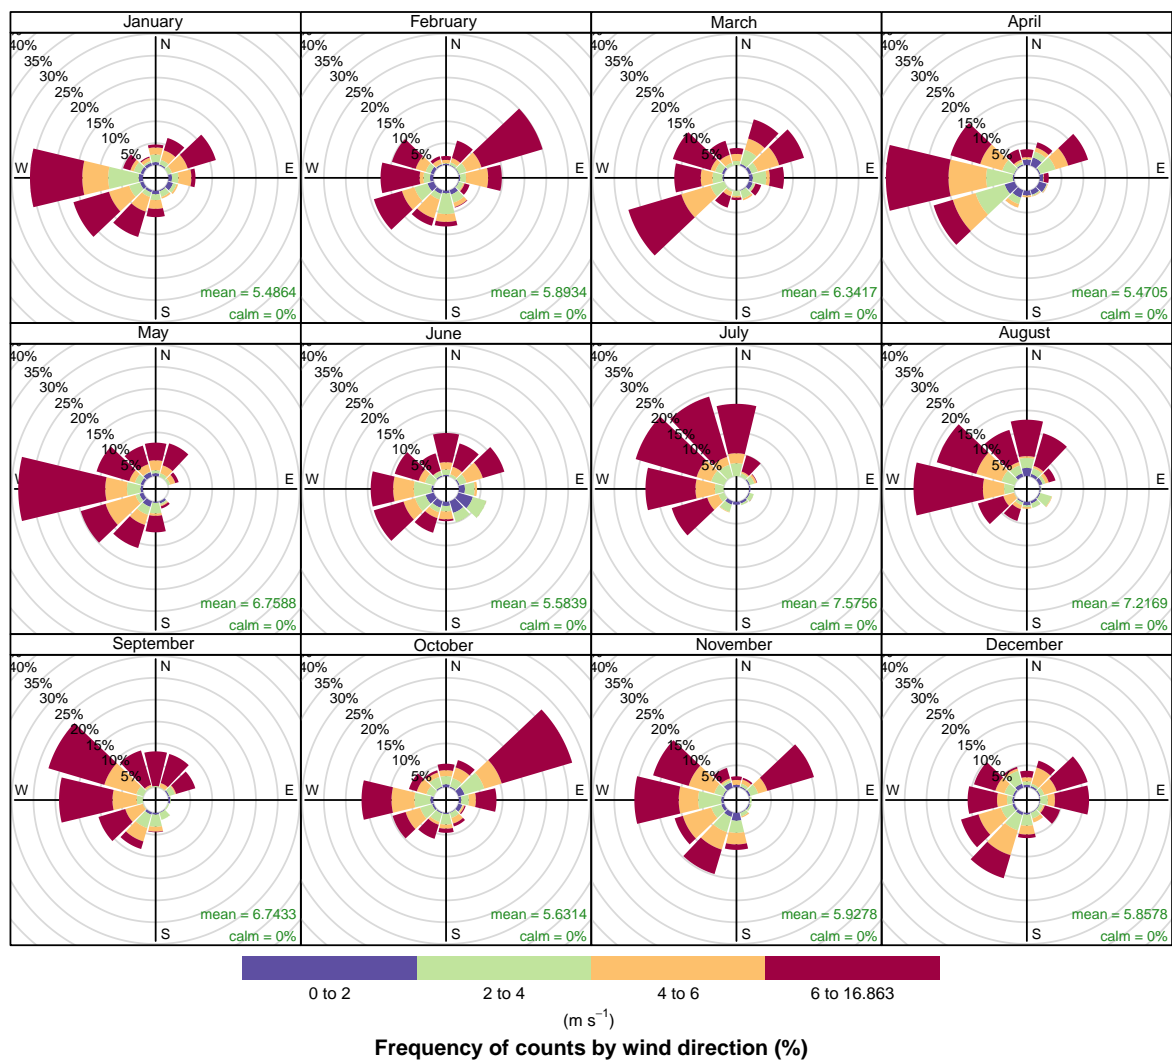

**Figure S34.** Wind rose Cape Grim location for 2018.

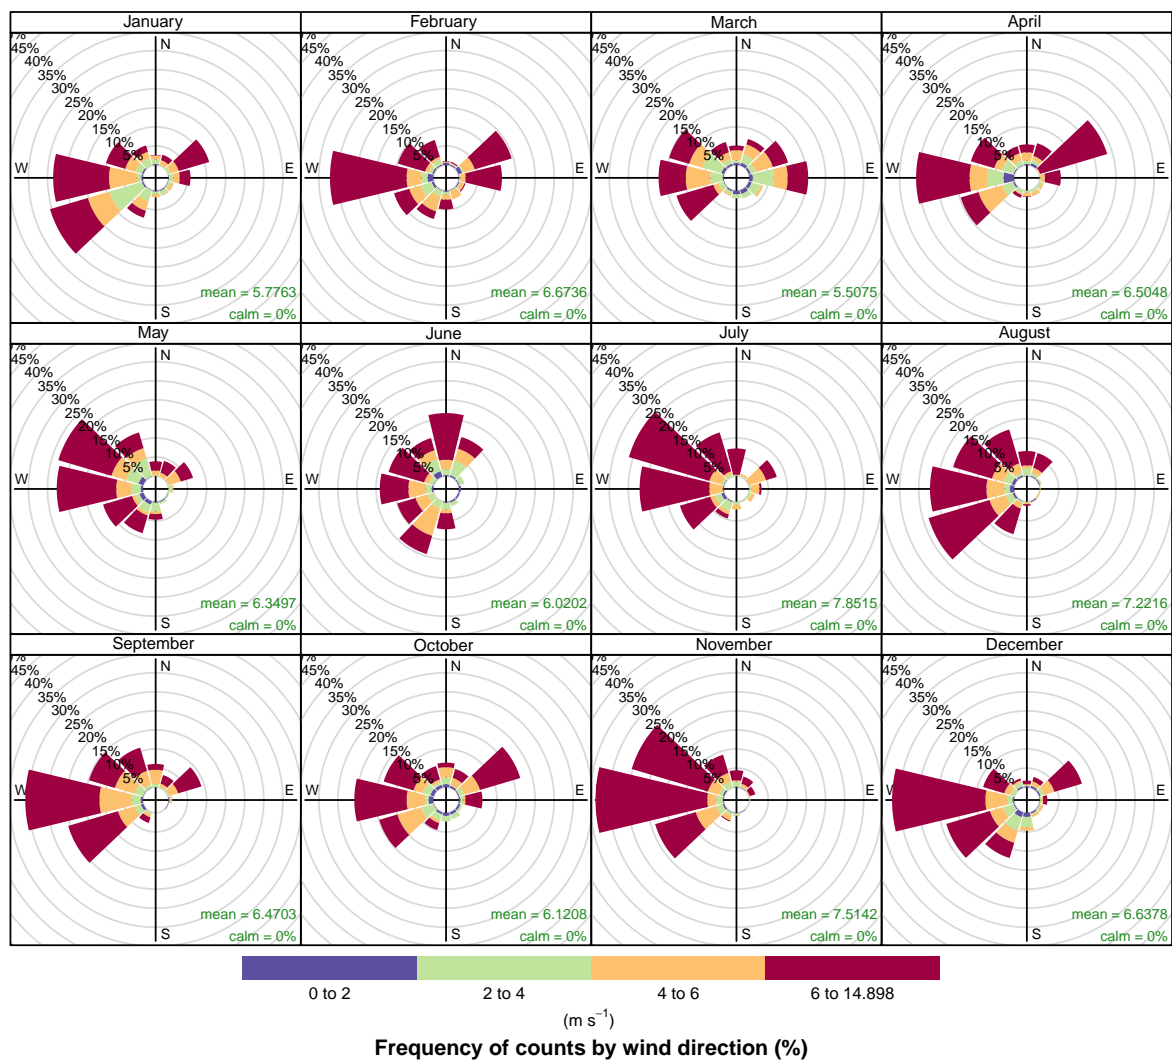

**Figure S35.** Wind rose Cape Grim location for 2019.
